# Supplementary material
Source: PubMed Central journal article supplement (PMC6983331)

**Supplemental Figure 1.** Optimization of multiple reaction monitoring (MRM) detection on the Bruker EvoQ LC-TQ Elite Triple Quadrupole Mass Spectrometer and confirmation experiments using the Bruker Solarix 7T Fourier-transform ion cyclotron resonance (FT-ICR) ultra high-resolution mass spectrometer (UHRMS).

- A) Optimization of MRM collision-induced dissociation (CID). The most abundant MRM transitions were selected for LC-MS/MS quantitative analysis, while the second highest were selected for confirmation. In order to add an additional differentiation feature between the isomers JHB<sub>3</sub> and JHSB<sub>3</sub>, an exception for this rule was in which the third most abundant MRM transition for JHB<sub>3</sub> (m/z 283→251) was used instead of the second most abundant (m/z 283→119) which was common between them.
- B) Comparison of UHRMS signals for protonated pseudomolecular ions ([M+H]<sup>+</sup>) with theoretical (according to molecular formulas). Internal calibration was used. Very low mass errors (<0.2 ppm) were observed for all compounds.
- C) Fragmentation spectra (CID, MS/MS) obtained by direct infusion of individual standards using the FT-ICR UHRMS.
- D) Accurate masses of protonated pseudomolecular ion ([M+H]<sup>+</sup>) and MS/MS fragments, with mass errors according to proposed structures.
- E) Proposed fragmentation pathways for JHs and MF based on collision-induced dissociation (CID) MS/MS experiments using UHRMS.

# A: JH I

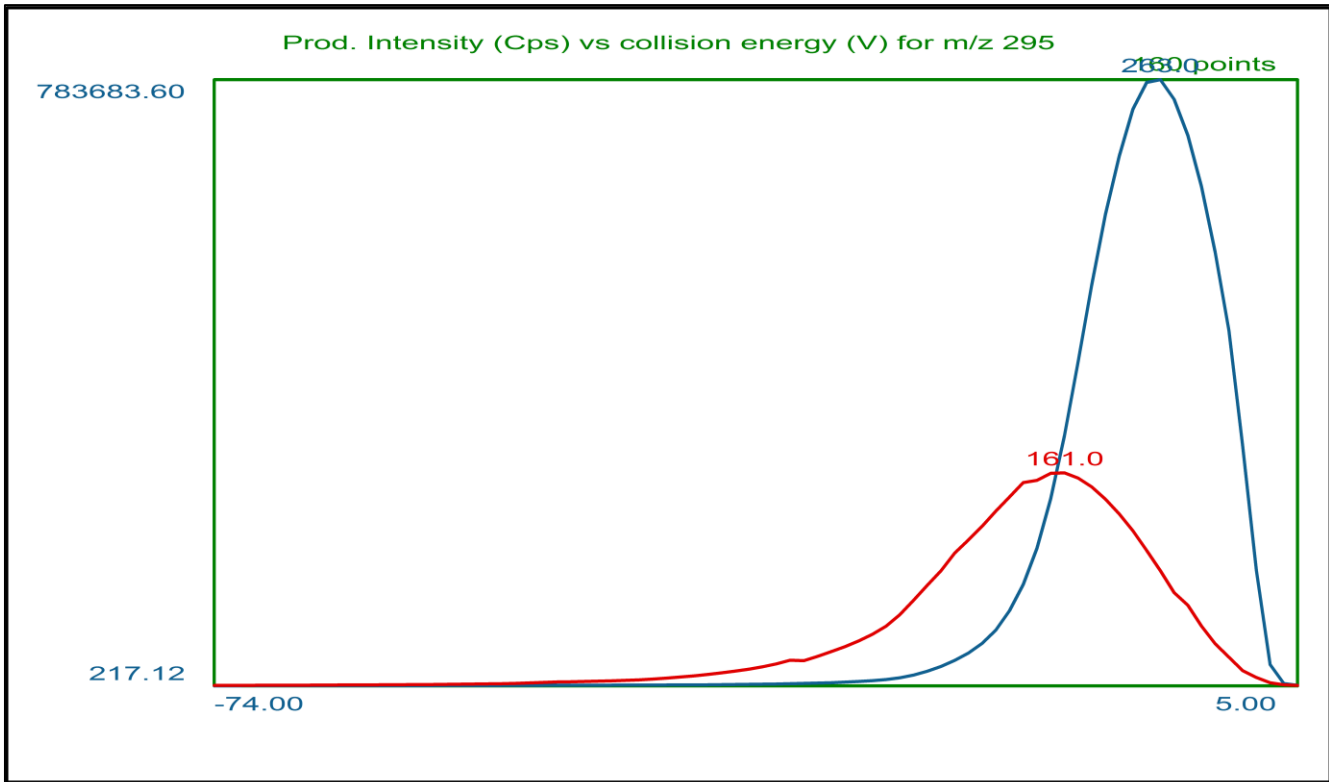

Instrument:

EVOQ LC-TQ Elite

Date:

10 Jan 2018 14:09:42

Compound: JH I

Charge State: 1

Precursor: 295.0 m/z

CID pressure : 1.5 mTorr

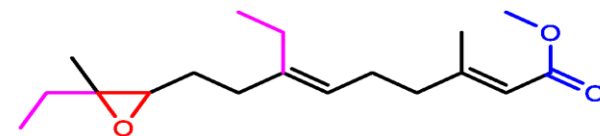

| Prod   | CE(V) | Intens. | Ratio(%) |
|--------|-------|---------|----------|
| 263.00 | -5.0  | 7.84e5  | 100.00   |
| 161.00 | -12.0 | 2.75e5  | 35.15    |

# B: JH I

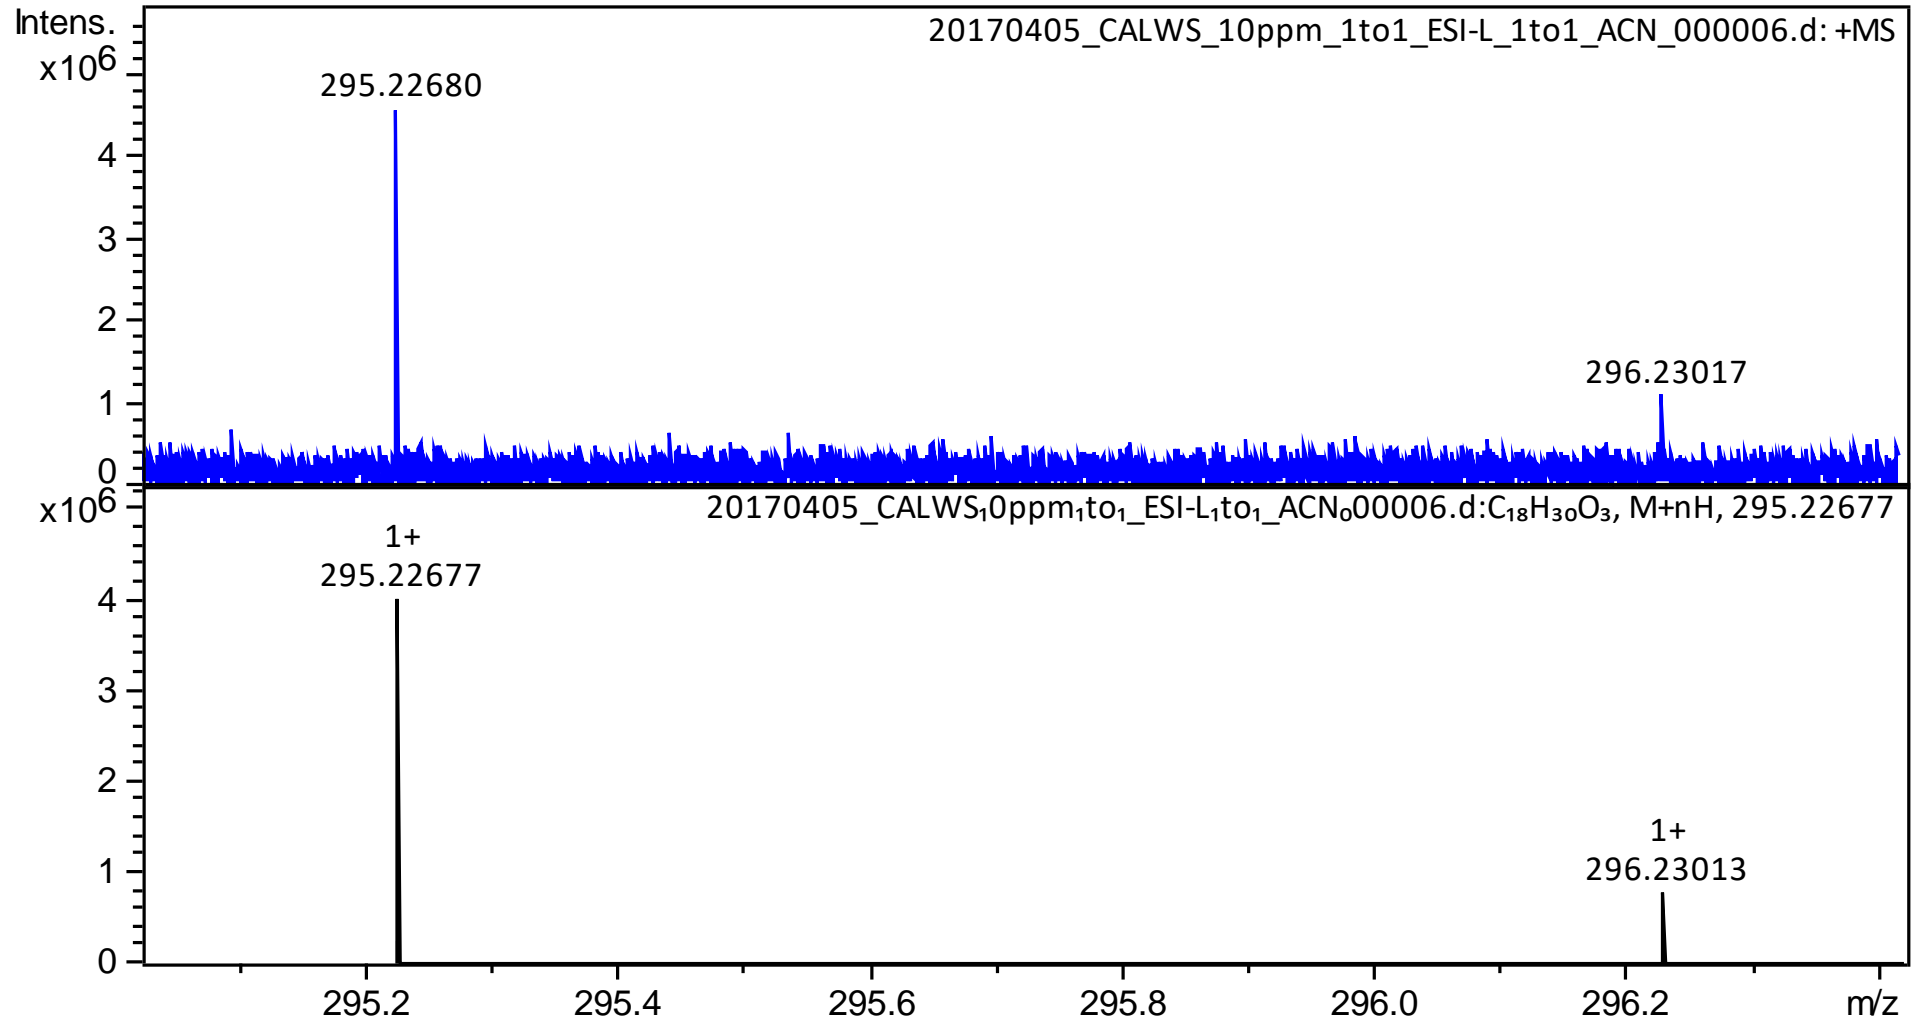

Ultra high resolution mass spectra of the standard obtained by direct infusion using the Solarix 7T FT-ICR MS .

# C: JH I

## Fourier-transformation cyclotron resonance (FT-ICR) ultra high-resolution MS/MS.

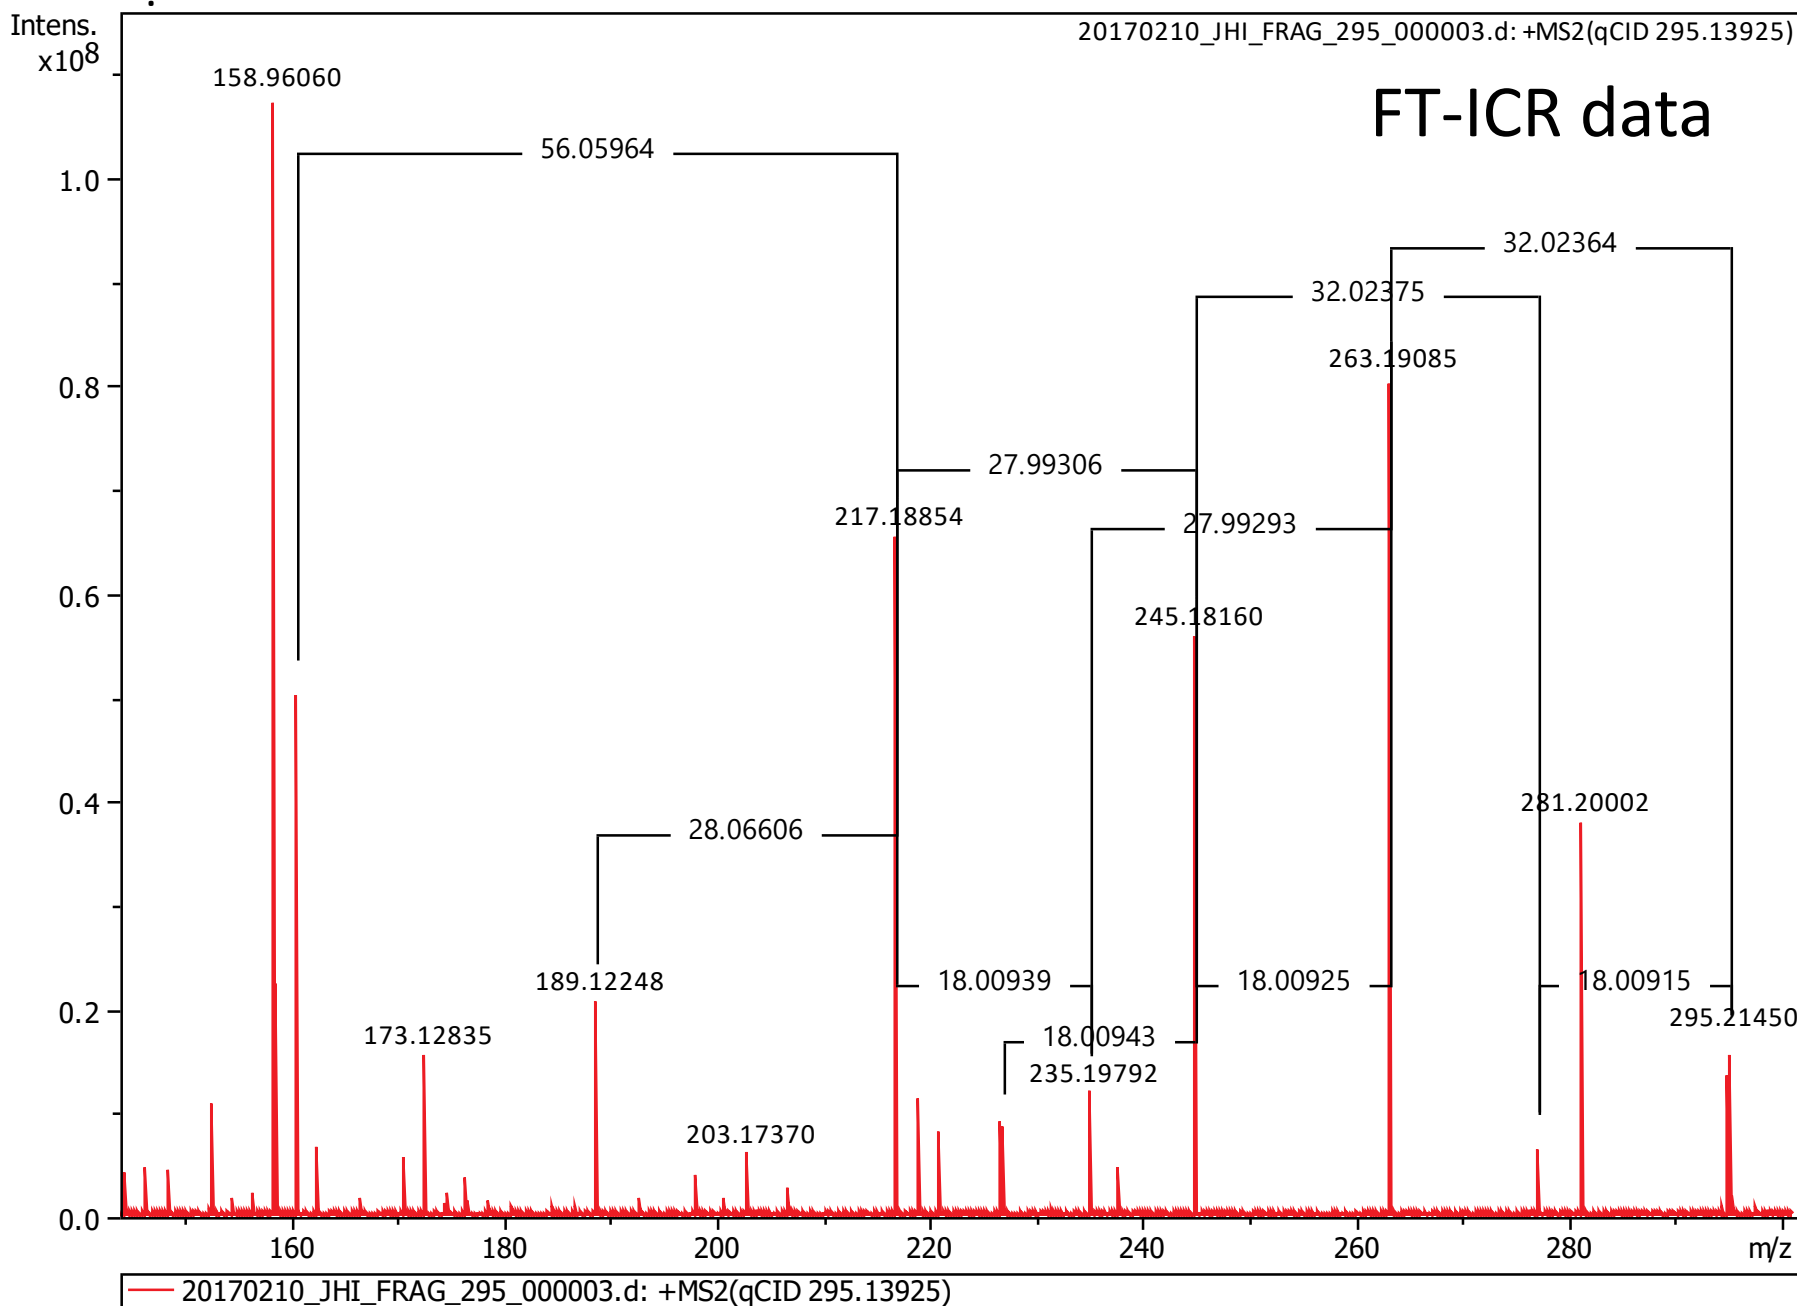

# D: JH I

Table showing the MS/MS fragments of the hormone using the Solarix 7T FT-ICR MS.

| UHRMS data                                  | m/z       | Formula                                                          | $\Delta m/z$ (ppm) |
|---------------------------------------------|-----------|------------------------------------------------------------------|--------------------|
| FT-ICR MS                                   | 295.22680 | [C <sub>18</sub> H <sub>30</sub> O <sub>3</sub> +H] <sup>+</sup> | 0.098              |
| FT-ICR MS <sup>2</sup><br>(CID on 295.2268) | 277.21593 | [C <sub>18</sub> H <sub>29</sub> O <sub>2</sub> +H] <sup>+</sup> | -0.999             |
|                                             | 263.20045 | C <sub>17</sub> H <sub>27</sub> O <sub>2</sub> <sup>+</sup>      | -0.407             |
|                                             | 245.18993 | C <sub>17</sub> H <sub>25</sub> O <sup>+</sup>                   | -0.253             |
|                                             | 235.20559 | C <sub>16</sub> H <sub>27</sub> O <sup>+</sup>                   | -0.221             |
|                                             | 217.19508 | C <sub>16</sub> H <sub>25</sub> <sup>+</sup>                     | 0.014              |
|                                             | 161.13249 | C <sub>12</sub> H <sub>17</sub> <sup>+</sup>                     | 0.081              |

# E: JH I

Proposed fragmentation pathways according to the FT-ICR results.

Black box: parent ion

Blue box: primary transition

Red box: secondary transition

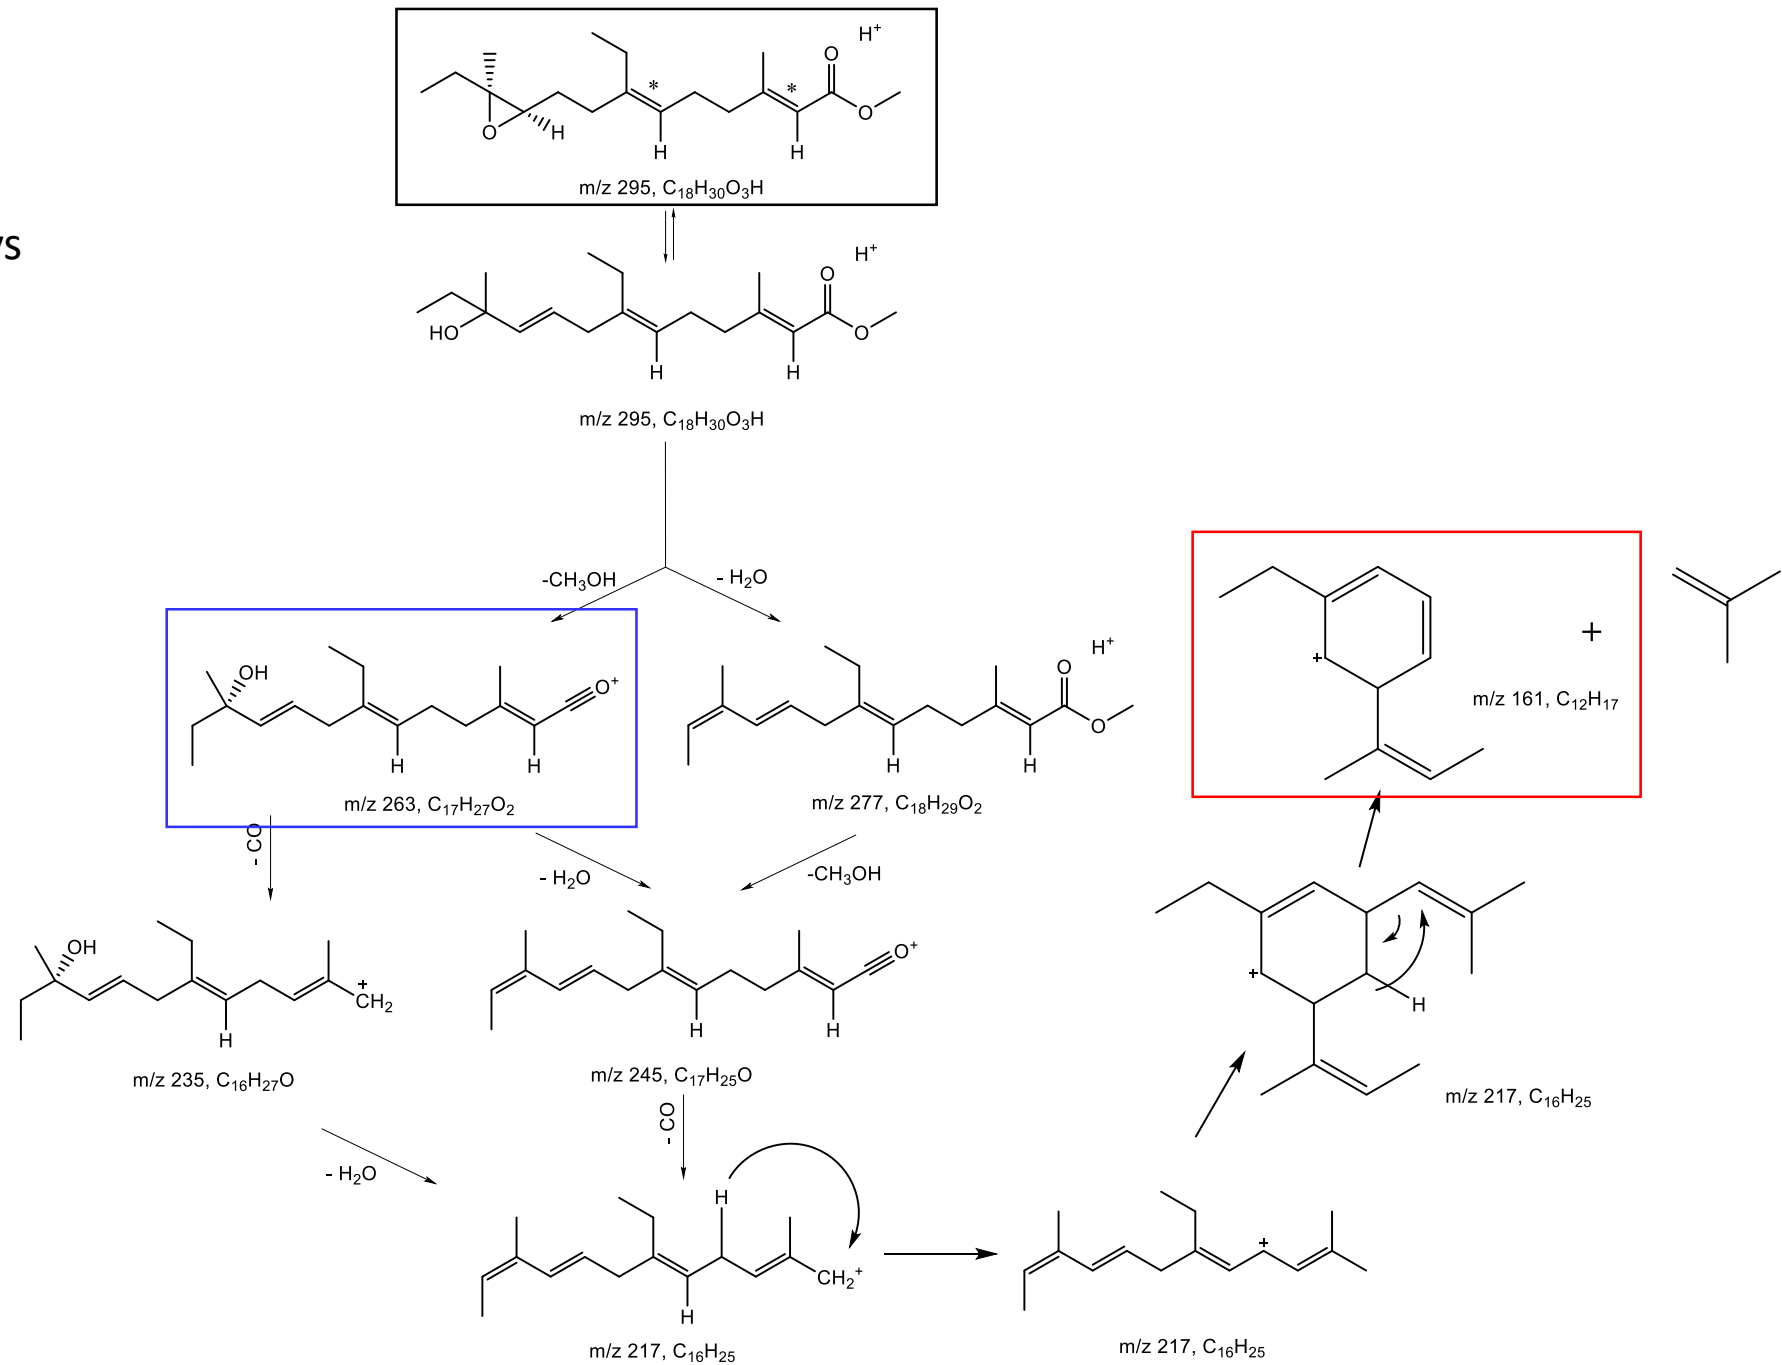

# A: JH II

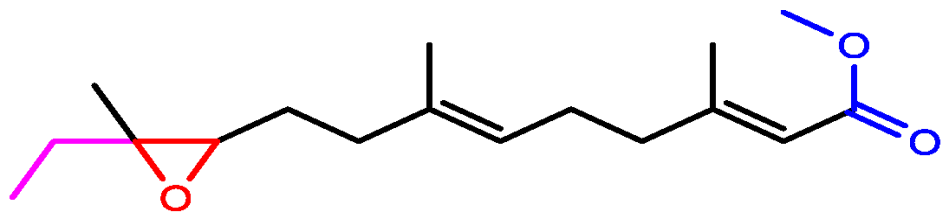

Multiple reaction monitoring (MRM) optimization output using the Bruker EvoQ LC-TQ Elite Triple Quadrupole Mass Spectrometer.

## Bruker LC-TQ MRM optimization output

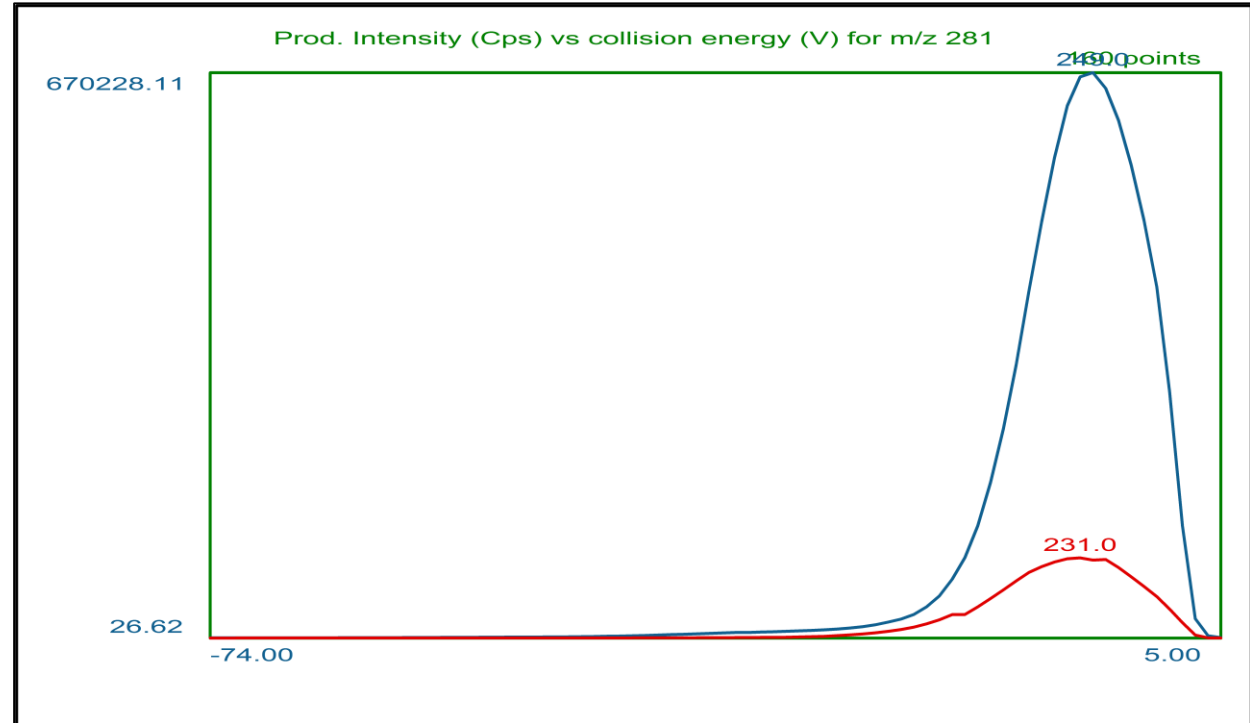

|                |                      |         |          |
|----------------|----------------------|---------|----------|
| Instrument:    | EVOQ LC-TQ Elite     |         |          |
| Date:          | 10 Jan 2018 14:09:16 |         |          |
| Compound:      | JH II                |         |          |
| Charge State:  | 1                    |         |          |
| Precursor:     | 281.0 m/z            |         |          |
| CID pressure : | 1.5 mTorr            |         |          |
| Prod           | CE(V)                | Intens. | Ratio(%) |
| 249.00         | -5.0                 | 6.70e5  | 100.00   |
| 231.00         | -6.0                 | 9.51e4  | 14.19    |

# B: JH II

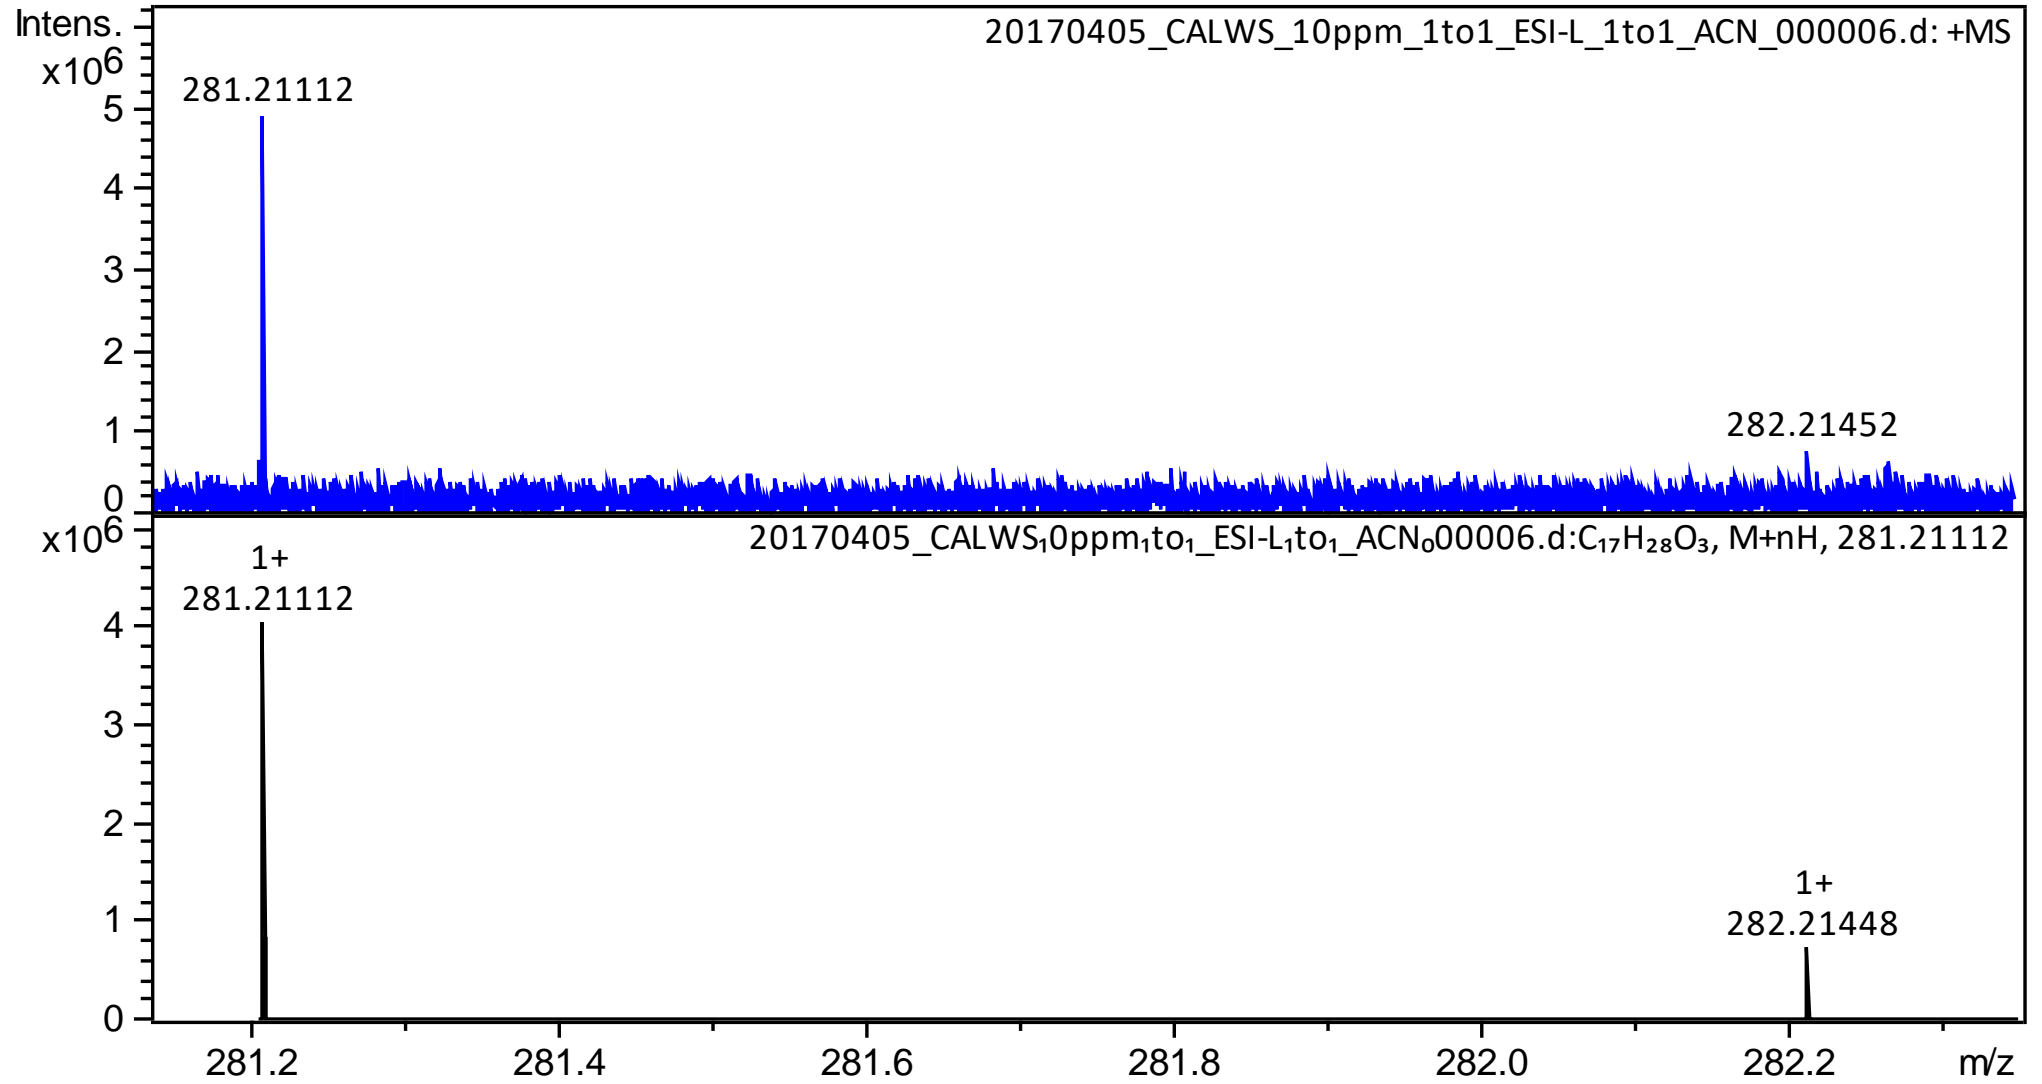

Ultra high resolution mass spectra of the standard obtained by direct infusion using the Solarix 7T FT-ICR MS .



# C: JH II

## Fourier-transformation cyclotron resonance (FT-ICR) ultra high-resolution MS/MS.

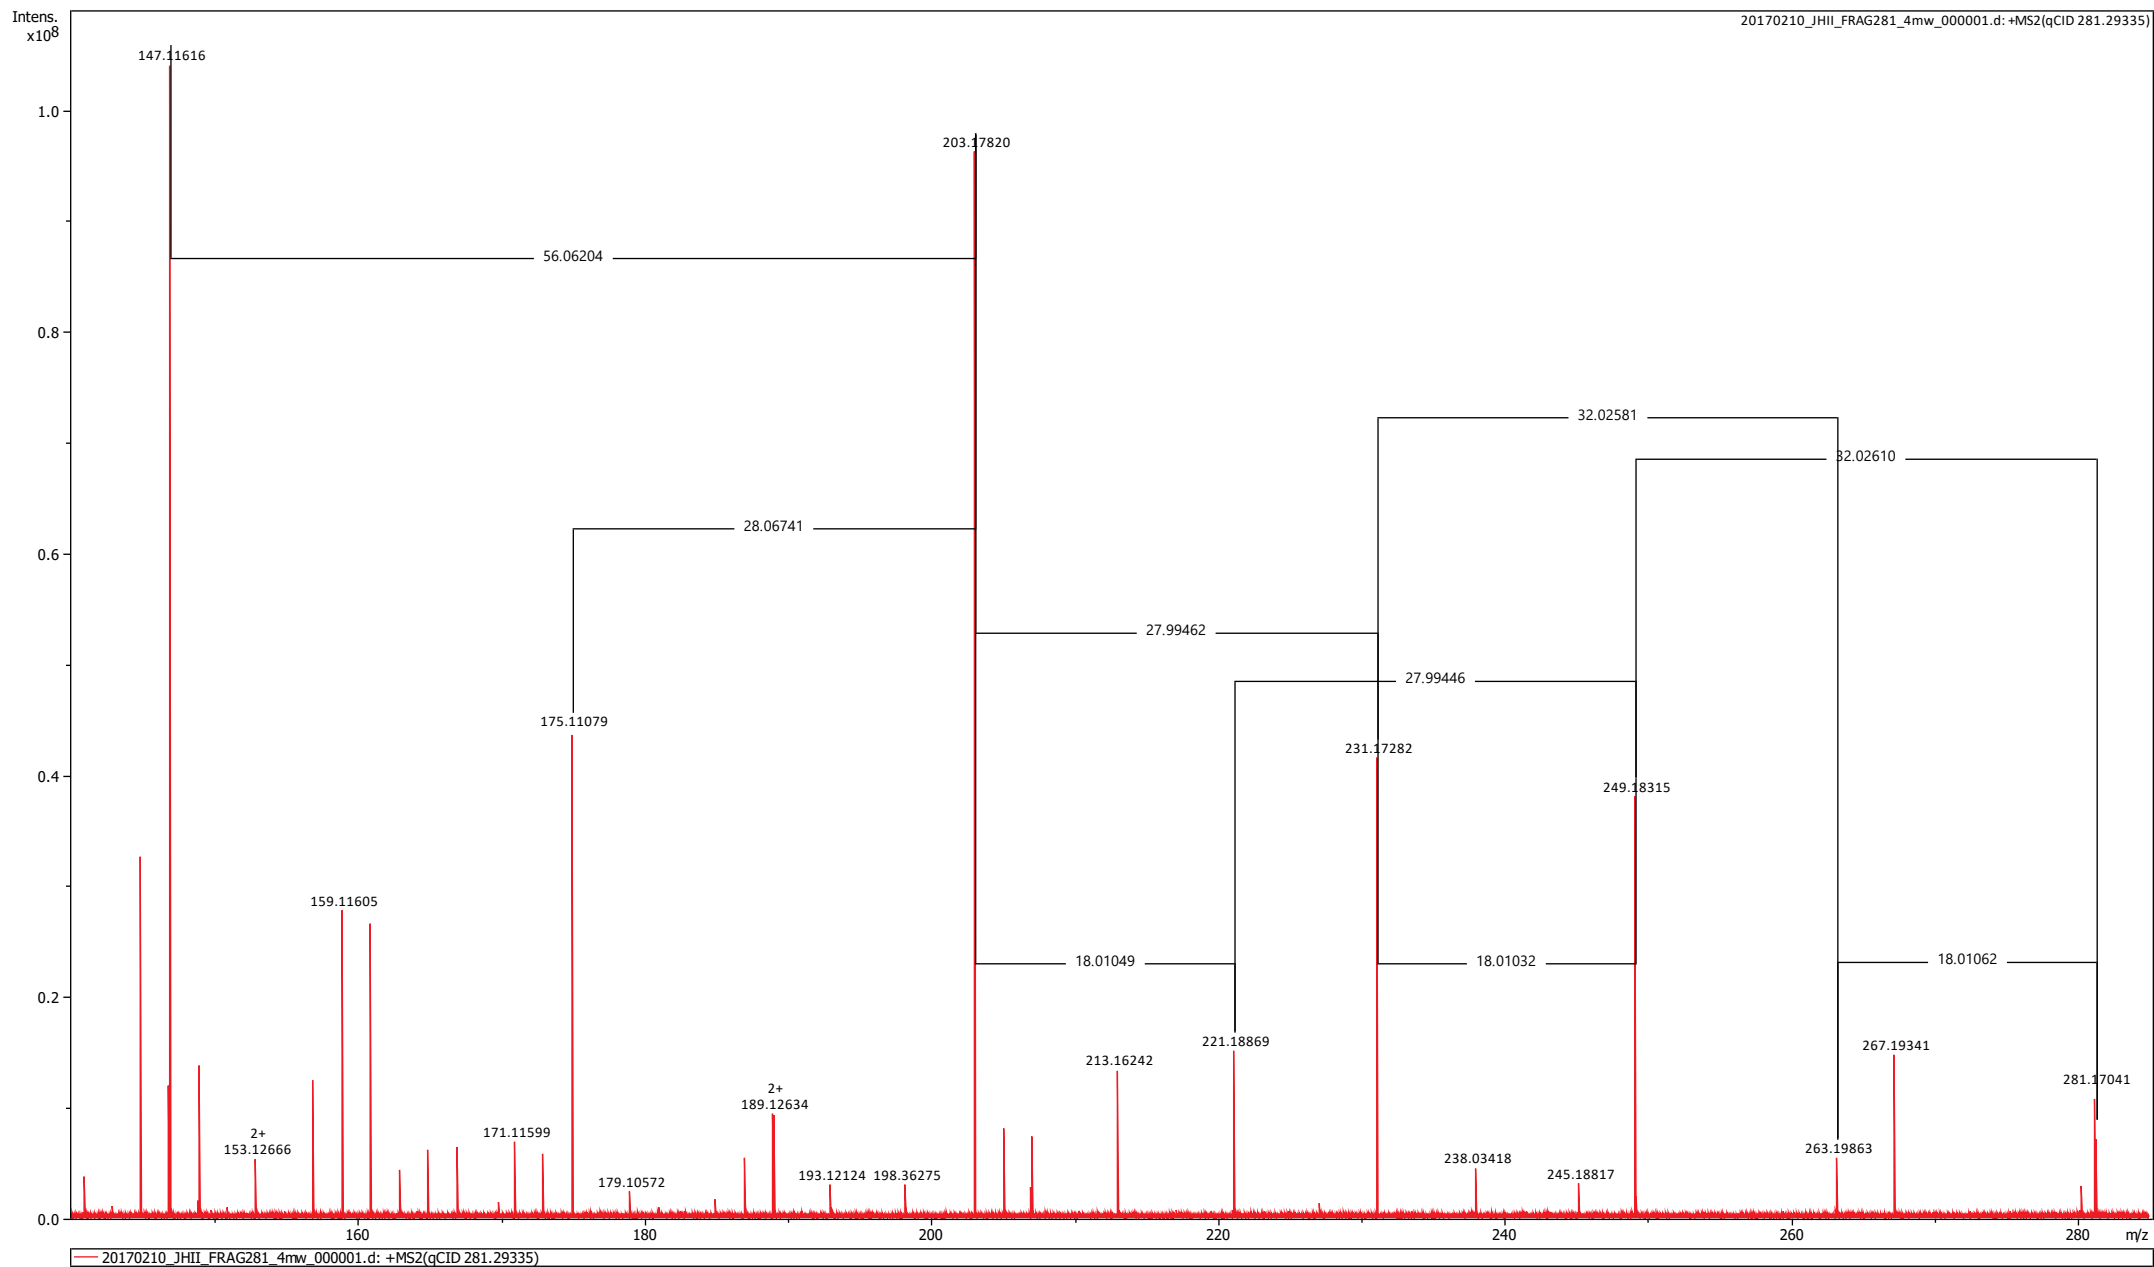

# D: JH II

Table showing the MS/MS fragments of the hormone using the Solarix 7T FT-ICR MS.

| UHRMS data                                   | m/z        | Formula                 | $\Delta m/z$ (ppm) |
|----------------------------------------------|------------|-------------------------|--------------------|
| FT-ICR MS                                    | 281.21112  | $[C_{17}H_{28}O_3+H]^+$ | <0.001             |
| FT-ICR MS <sup>2</sup><br>(CID on 281.21112) | 263.200557 | $[C_{17}H_{26}O_2+H]^+$ | 0.581              |
|                                              | 249.184906 | $C_{16}H_{25}O_2^+$     | 0.337              |
|                                              | 231.174342 | $C_{16}H_{23}O^+$       | 0.294              |
|                                              | 221.189992 | $C_{15}H_{25}O^+$       | 0.669              |
|                                              | 203.179427 | $C_{15}H_{23}^+$        | 0.015              |
|                                              | 263.200557 | $C_{11}H_{15}^+$        | 0.581              |

# E: JH II

Proposed fragmentation pathways according to the FT-ICR results.

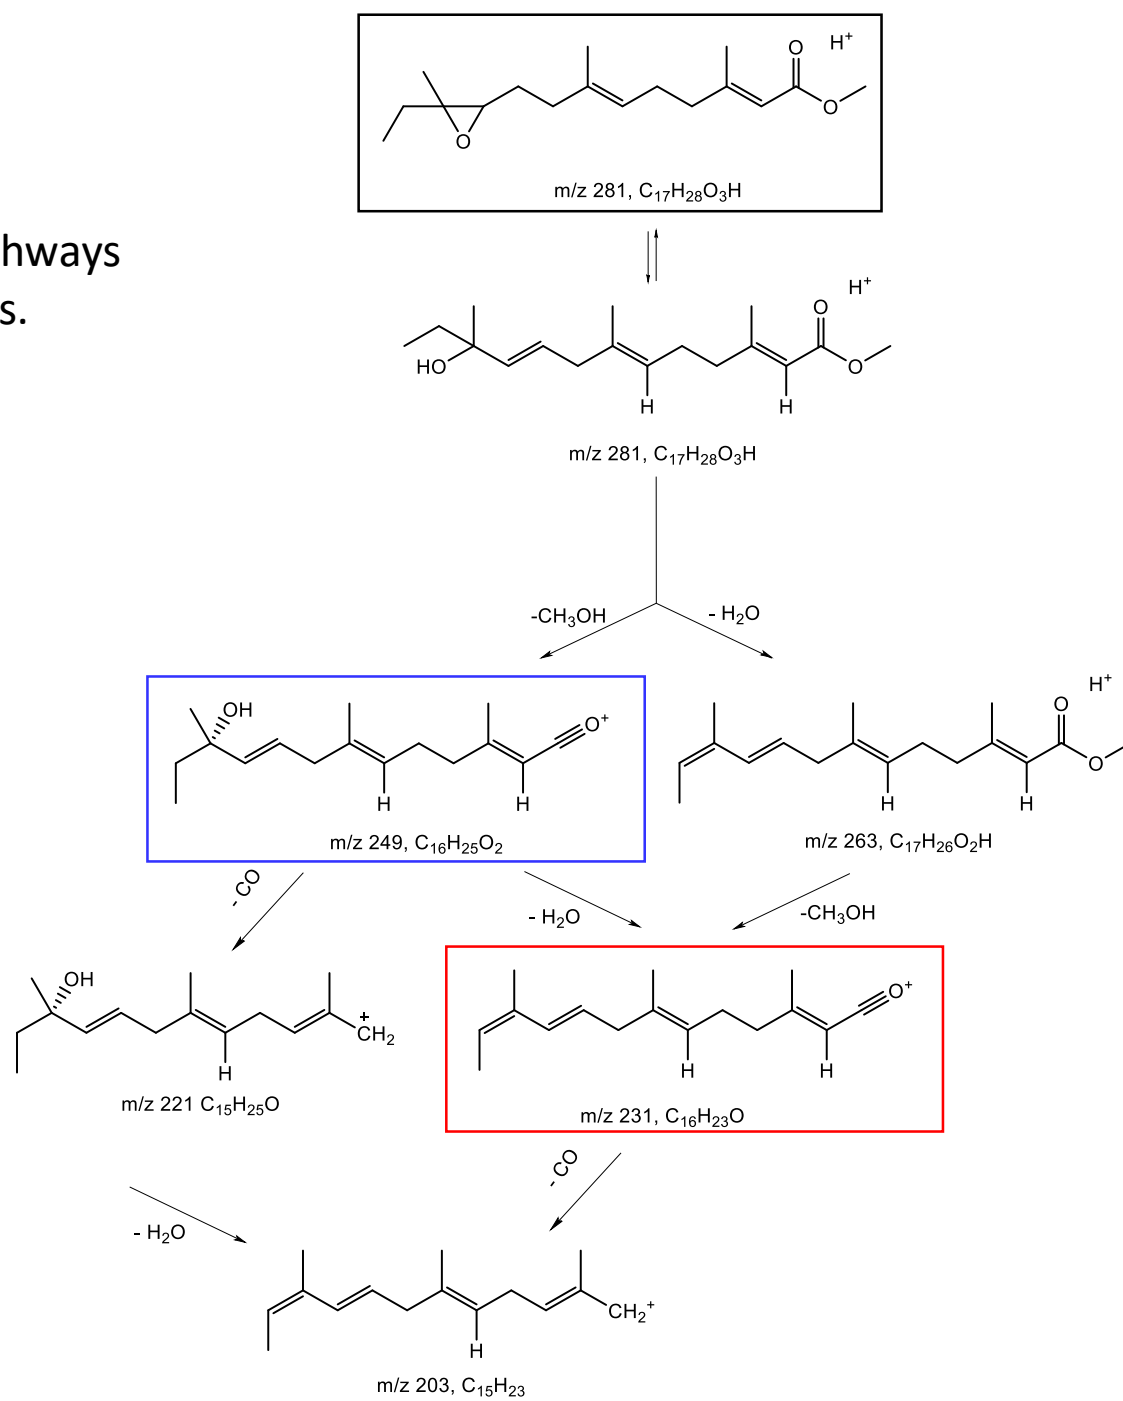

# A: JHSB3

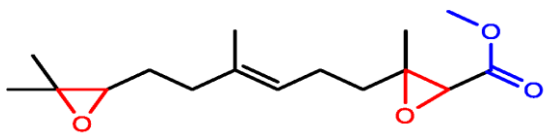

## Bruker LC-TQ MRM optimization output

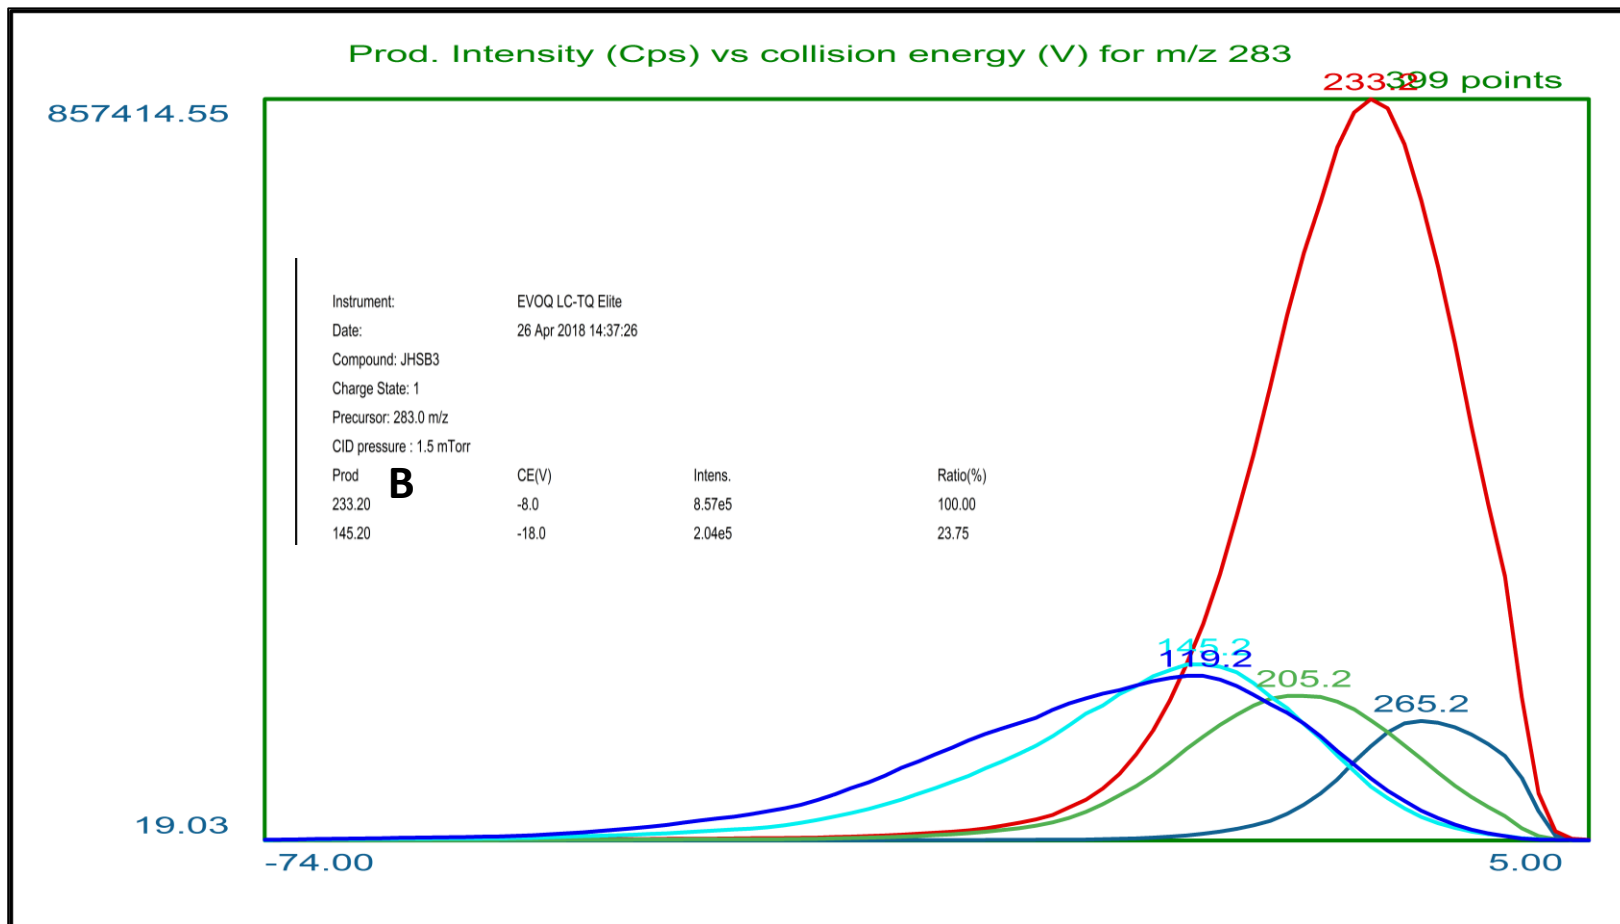

Multiple reaction monitoring (MRM) optimization output using the Bruker EvoQ LC-TQ Elite Triple Quadrupole Mass Spectrometer.

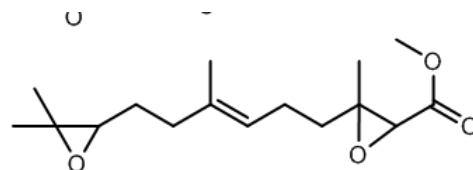

JHSB<sub>3</sub>

283.3 → 233.2 ; 8.0  
283.3 → 145.2 ; 18.0

8.8

# B: JHSB3

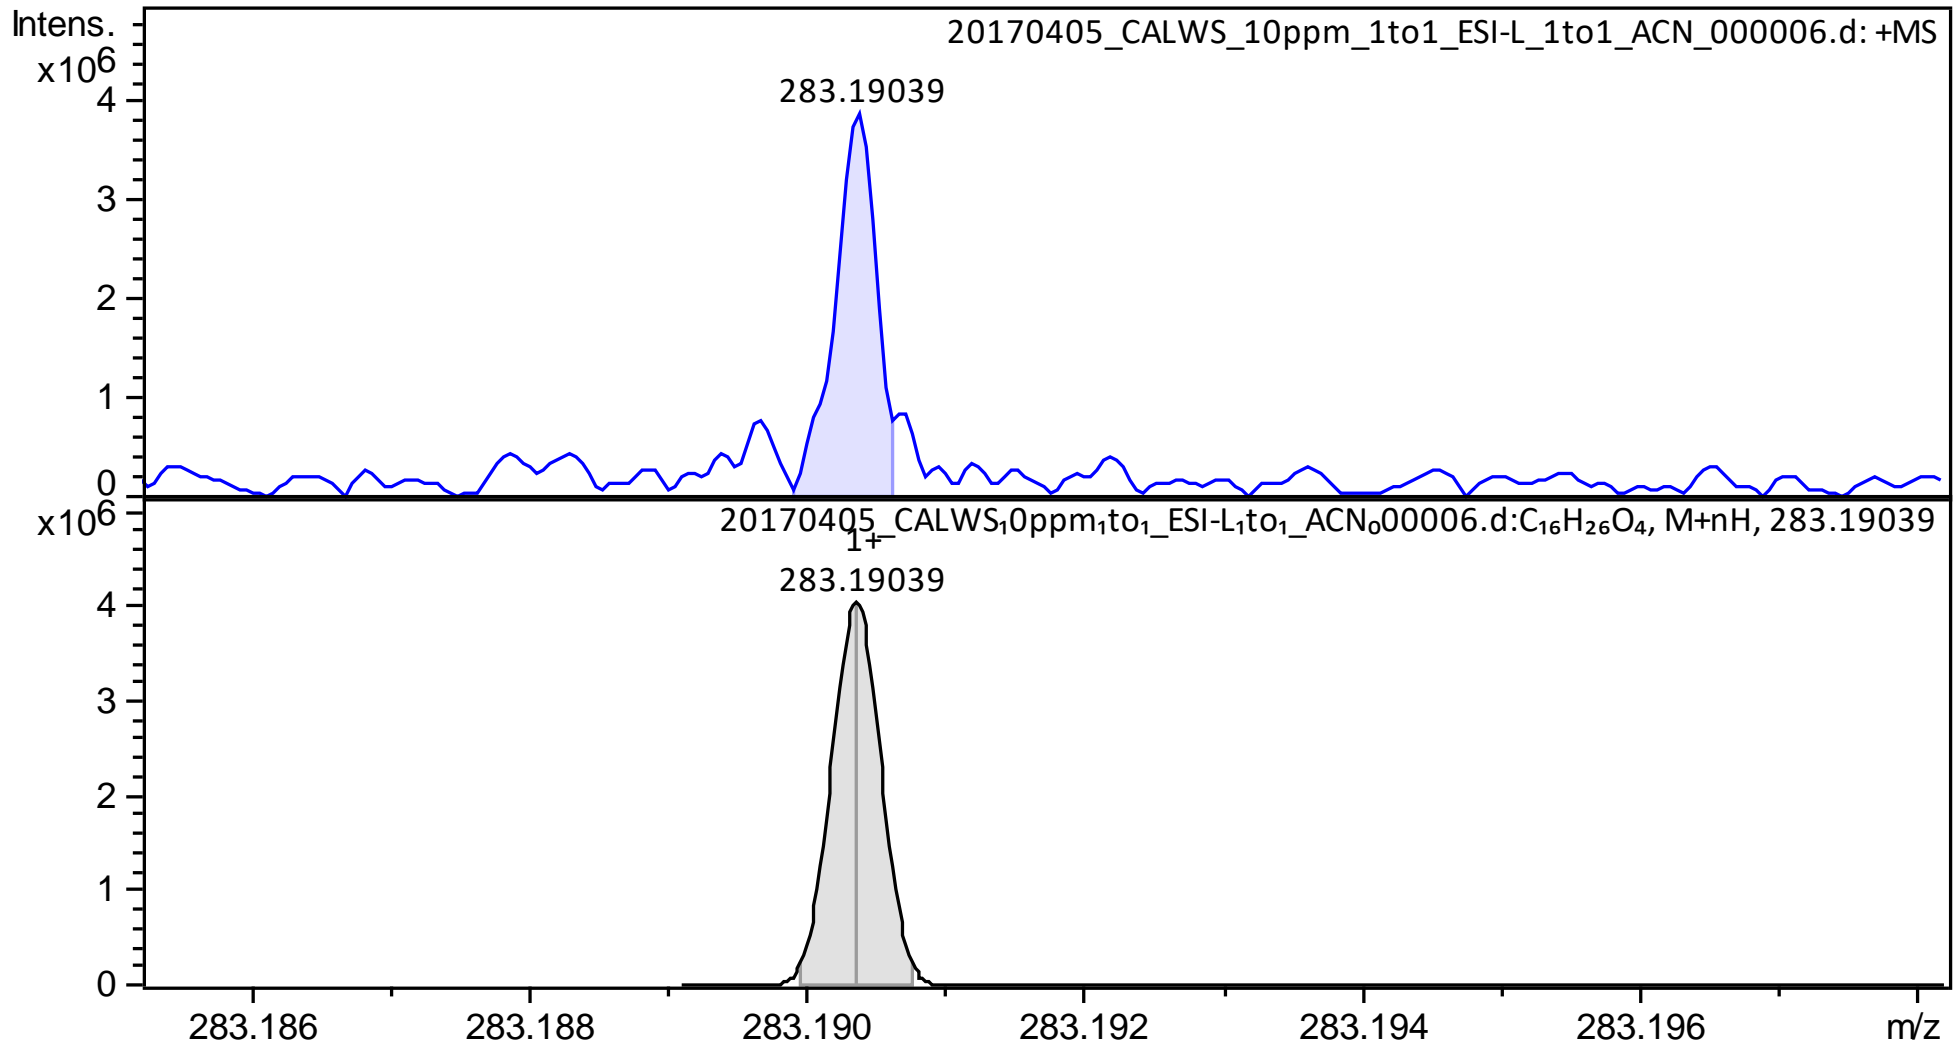

Ultra high resolution mass spectra of the standard obtained by direct infusion using the Solarix 7T FT-ICR MS .

# C: JHSB3

Fourier-transformation cyclotron resonance (FT-ICR) ultra high-resolution MS/MS.

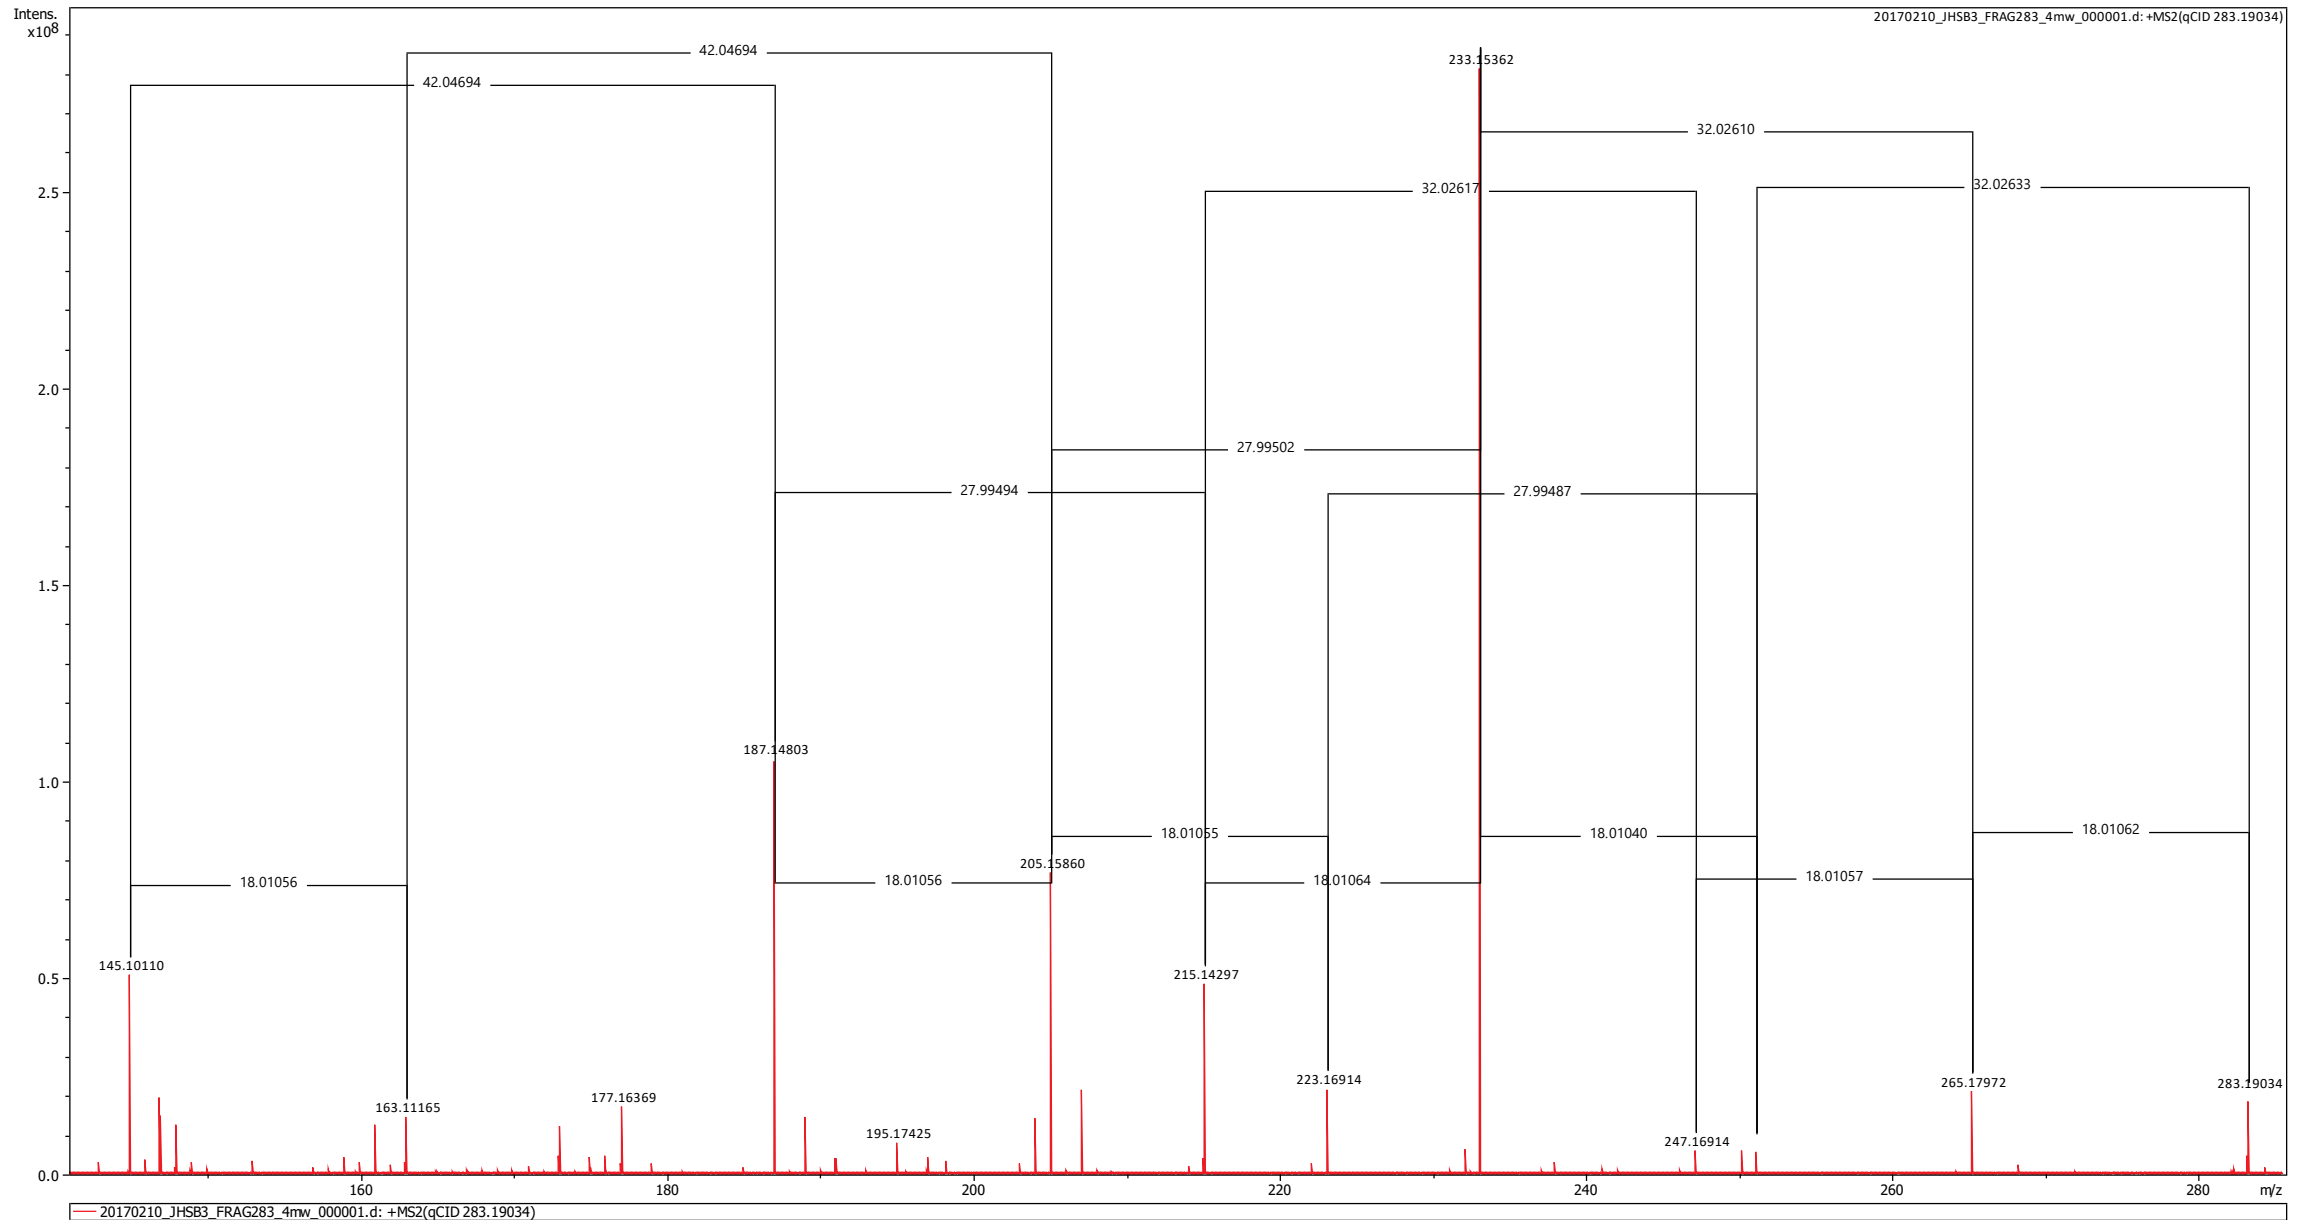

# D: JHSB3

Table showing the MS/MS fragments of the hormone using the Solarix 7T FT-ICR MS.

| UHRMS data                                | m/z       | Ion                                                                                                                      | Formula                                                          | $\Delta m/z$ (ppm) |
|-------------------------------------------|-----------|--------------------------------------------------------------------------------------------------------------------------|------------------------------------------------------------------|--------------------|
| FT-ICR MS                                 | 283.19039 | [M+H] <sup>+</sup>                                                                                                       | [C <sub>16</sub> H <sub>26</sub> O <sub>4</sub> +H] <sup>+</sup> | 0.014              |
| FT-ICR MS <sup>2</sup> (CID on 283.19039) | 265.17972 | [M+H] <sup>+</sup> - H <sub>2</sub> O                                                                                    | [C <sub>16</sub> H <sub>24</sub> O <sub>3</sub> +H] <sup>+</sup> | -0.381             |
|                                           | 251.16407 | [M+H] <sup>+</sup> - CH <sub>3</sub> OH                                                                                  | C <sub>15</sub> H <sub>23</sub> O <sub>3</sub> <sup>+</sup>      | -0.402             |
|                                           | 247.16914 | [M+H] <sup>+</sup> - H <sub>2</sub> O - H <sub>2</sub> O                                                                 | [C <sub>16</sub> H <sub>22</sub> O <sub>2</sub> +H] <sup>+</sup> | -0.469             |
|                                           | 233.15362 | [M+H] <sup>+</sup> - H <sub>2</sub> O - CH <sub>3</sub> OH<br>[M+H] <sup>+</sup> - CH <sub>3</sub> OH - H <sub>2</sub> O | C <sub>15</sub> H <sub>21</sub> O <sub>2</sub> <sup>+</sup>      | 0.060              |
|                                           | 223.16914 |                                                                                                                          | C <sub>14</sub> H <sub>23</sub> O <sub>2</sub> <sup>+</sup>      | -0.520             |
|                                           | 215.14297 | [M+H] <sup>+</sup> - H <sub>2</sub> O - CH <sub>3</sub> OH - CO                                                          | C <sub>15</sub> H <sub>19</sub> O <sup>+</sup>                   | -0.335             |
|                                           | 205.15860 | [M+H] <sup>+</sup> - H <sub>2</sub> O - CH <sub>3</sub> OH - CO                                                          | C <sub>14</sub> H <sub>21</sub> O <sup>+</sup>                   | -0.445             |
|                                           | 187.14803 |                                                                                                                          | C <sub>14</sub> H <sub>19</sub> <sup>+</sup>                     | -0.518             |
|                                           | 145.10110 |                                                                                                                          | C <sub>11</sub> H <sub>13</sub> <sup>+</sup>                     | -0.530             |

# E: JHSB3

Proposed fragmentation pathways according to the FT-ICR results.

Black box: parent ion

Blue box: primary transition

Red box: secondary transition

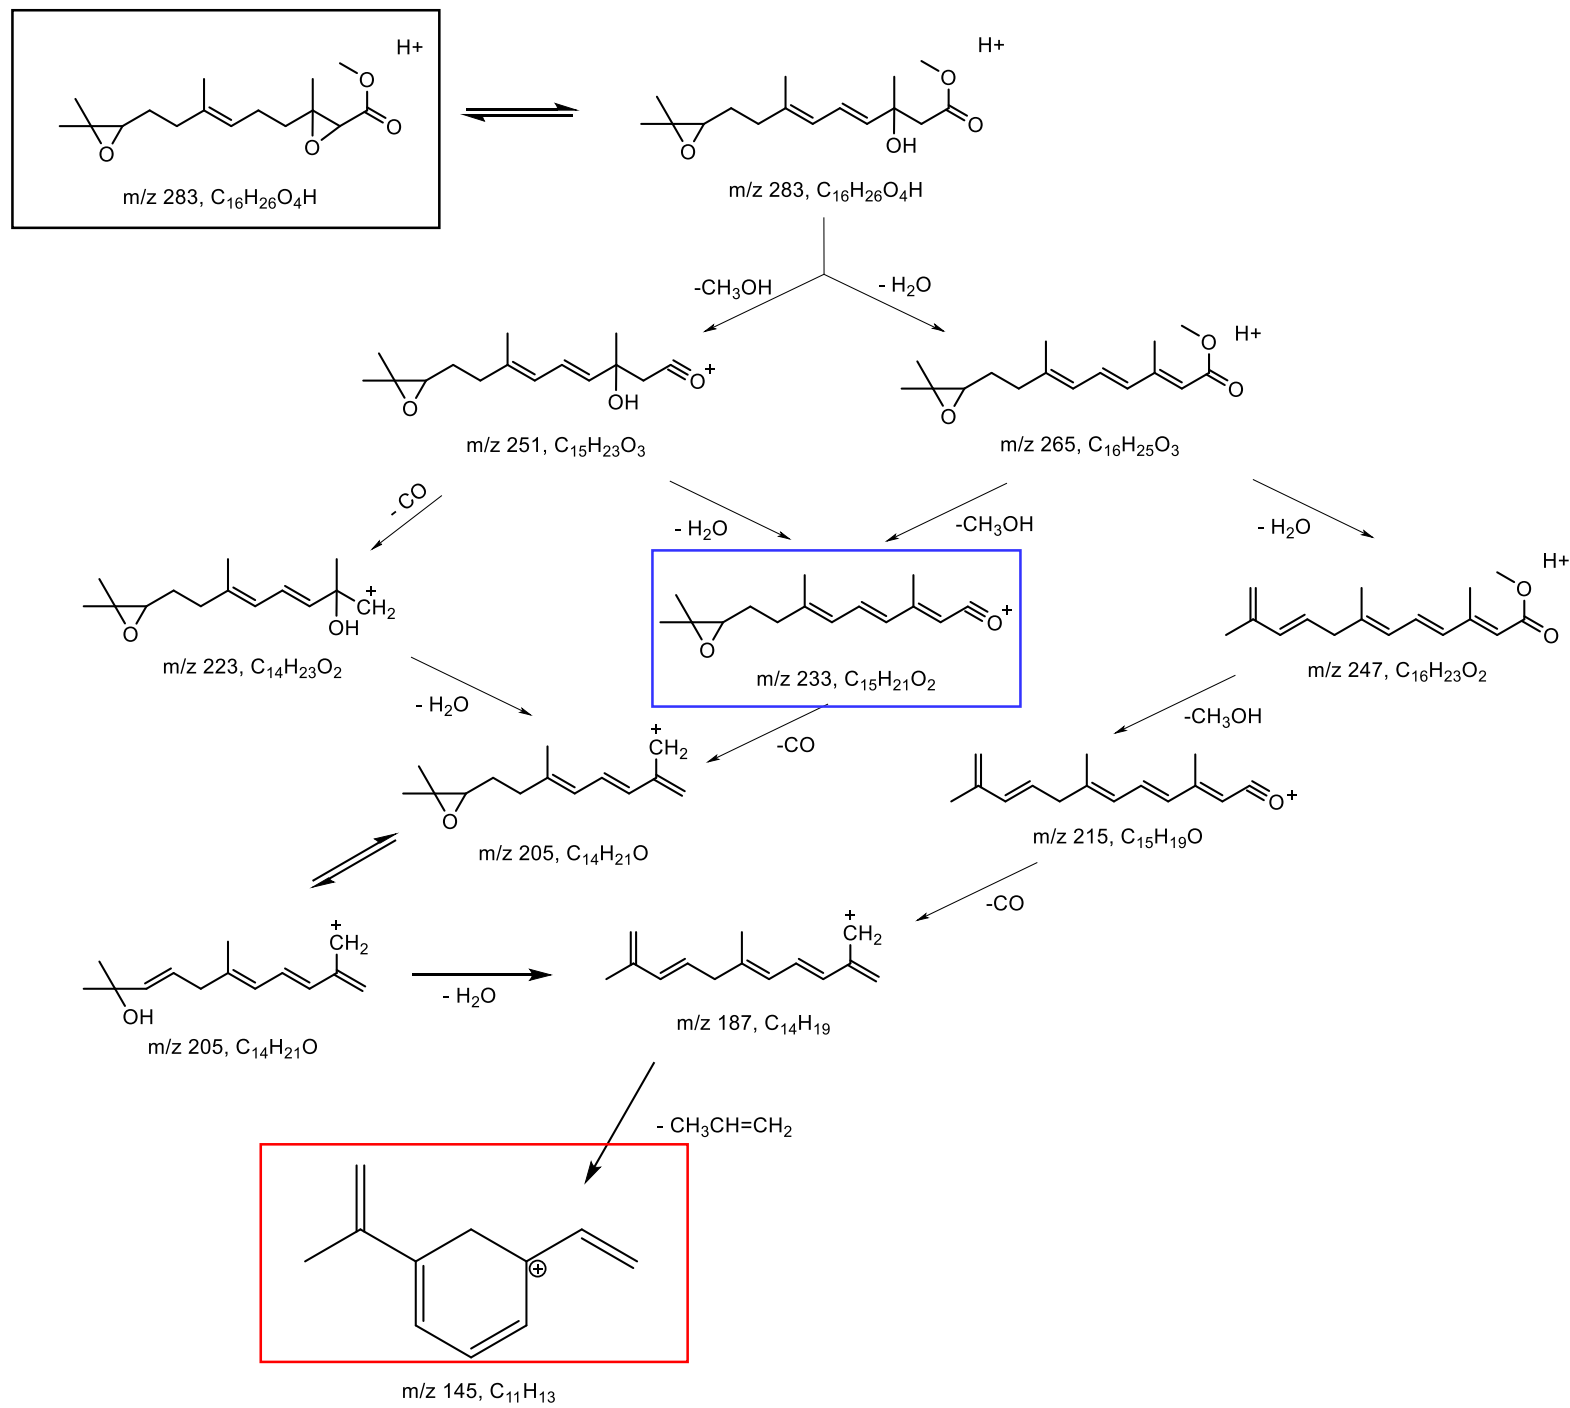



# A: JHB3

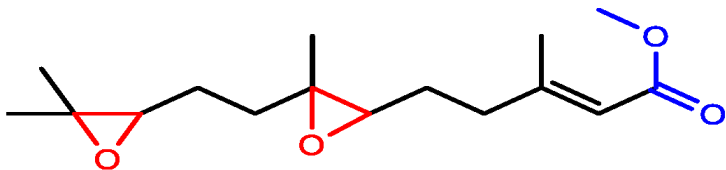

Multiple reaction monitoring (MRM) optimization output using the Bruker EvoQ LC-TQ Elite Triple Quadrupole Mass Spectrometer.

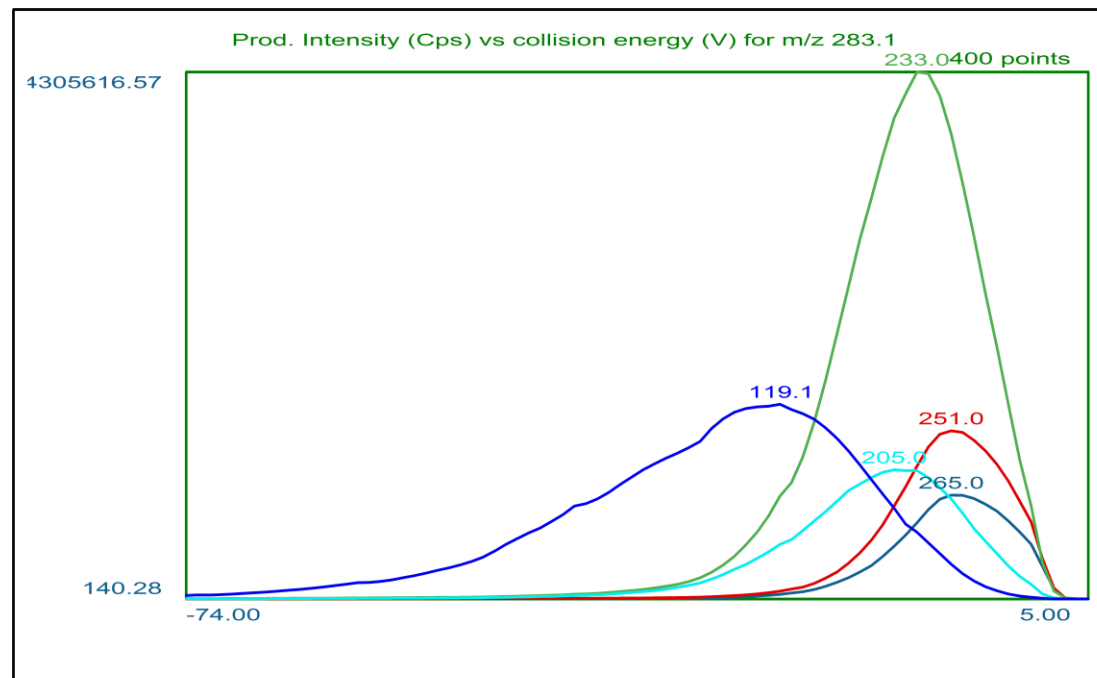

Instrument: EVOQ LC-TQ Elite  
Date: 27 Aug 2019 9:02:16  
Compound: JHB3  
Charge State: 1  
Precursor: 283.1 m/z  
CID pressure : 1.5 mTorr

**m/z 251 was selected as secondary  
(instead of m/z 119) because it is  
not abundant for JHSB3**

| Prod   | CE(V) | Intens. | Ratio(%) |
|--------|-------|---------|----------|
| 233.00 | -10.0 | 4.31e6  | 100.00   |
| 119.10 | -22.0 | 1.59e6  | 36.96    |
| 251.00 | -7.0  | 1.37e6  | 31.93    |
| 205.00 | -12.0 | 1.06e6  | 24.51    |
| 265.00 | -7.0  | 8.49e5  | 19.72    |

# B: JHB3

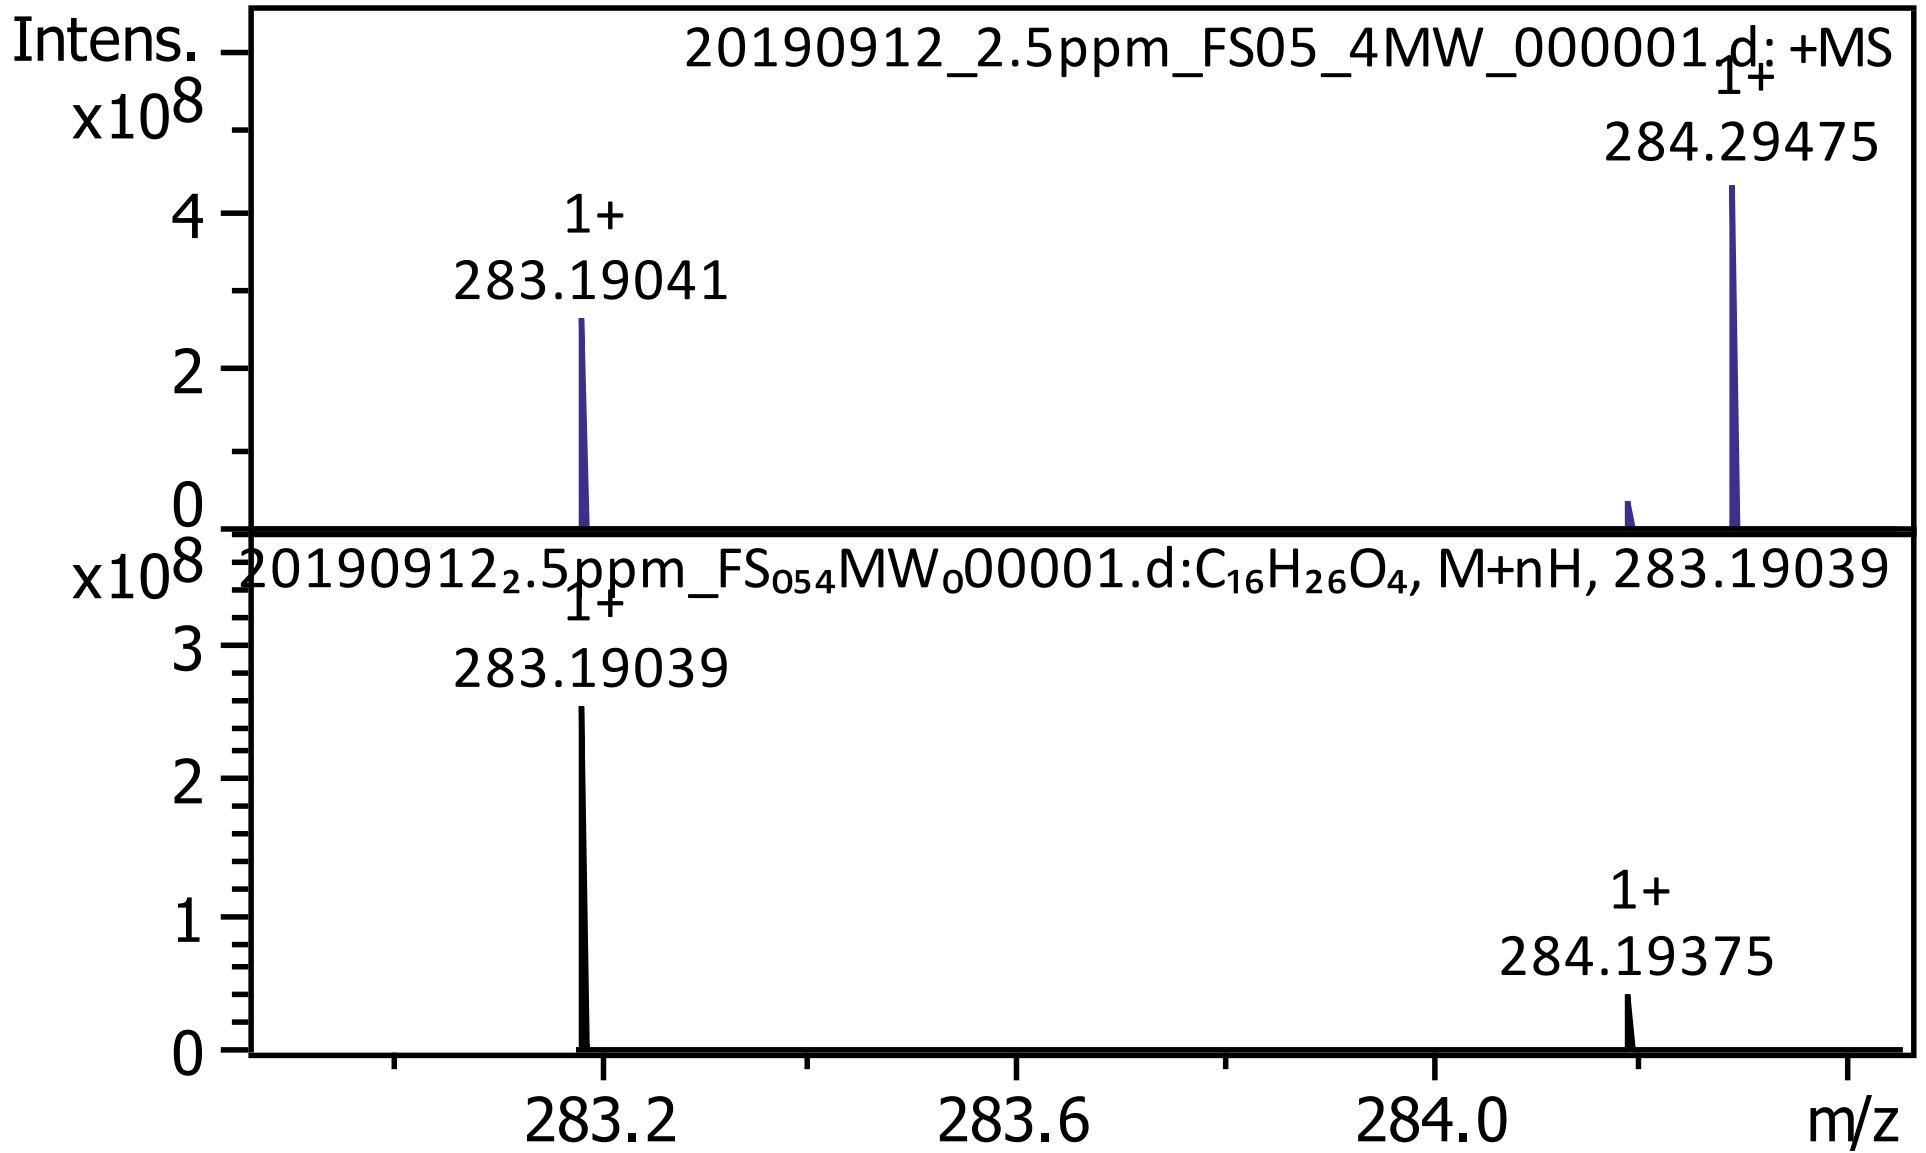

Ultra high resolution mass spectra of the standard obtained by direct infusion using the Solarix 7T FT-ICR MS .

Intens.  
x10<sup>7</sup>

20190912\_2.5ppm\_ISO283\_CID8\_02\_4MW\_000001.d: +MS2(qCID 283.19000)

# C: JHB3

Fourier-transformation  
cyclotron resonance (FT-ICR)  
ultra high-resolution MS/MS.

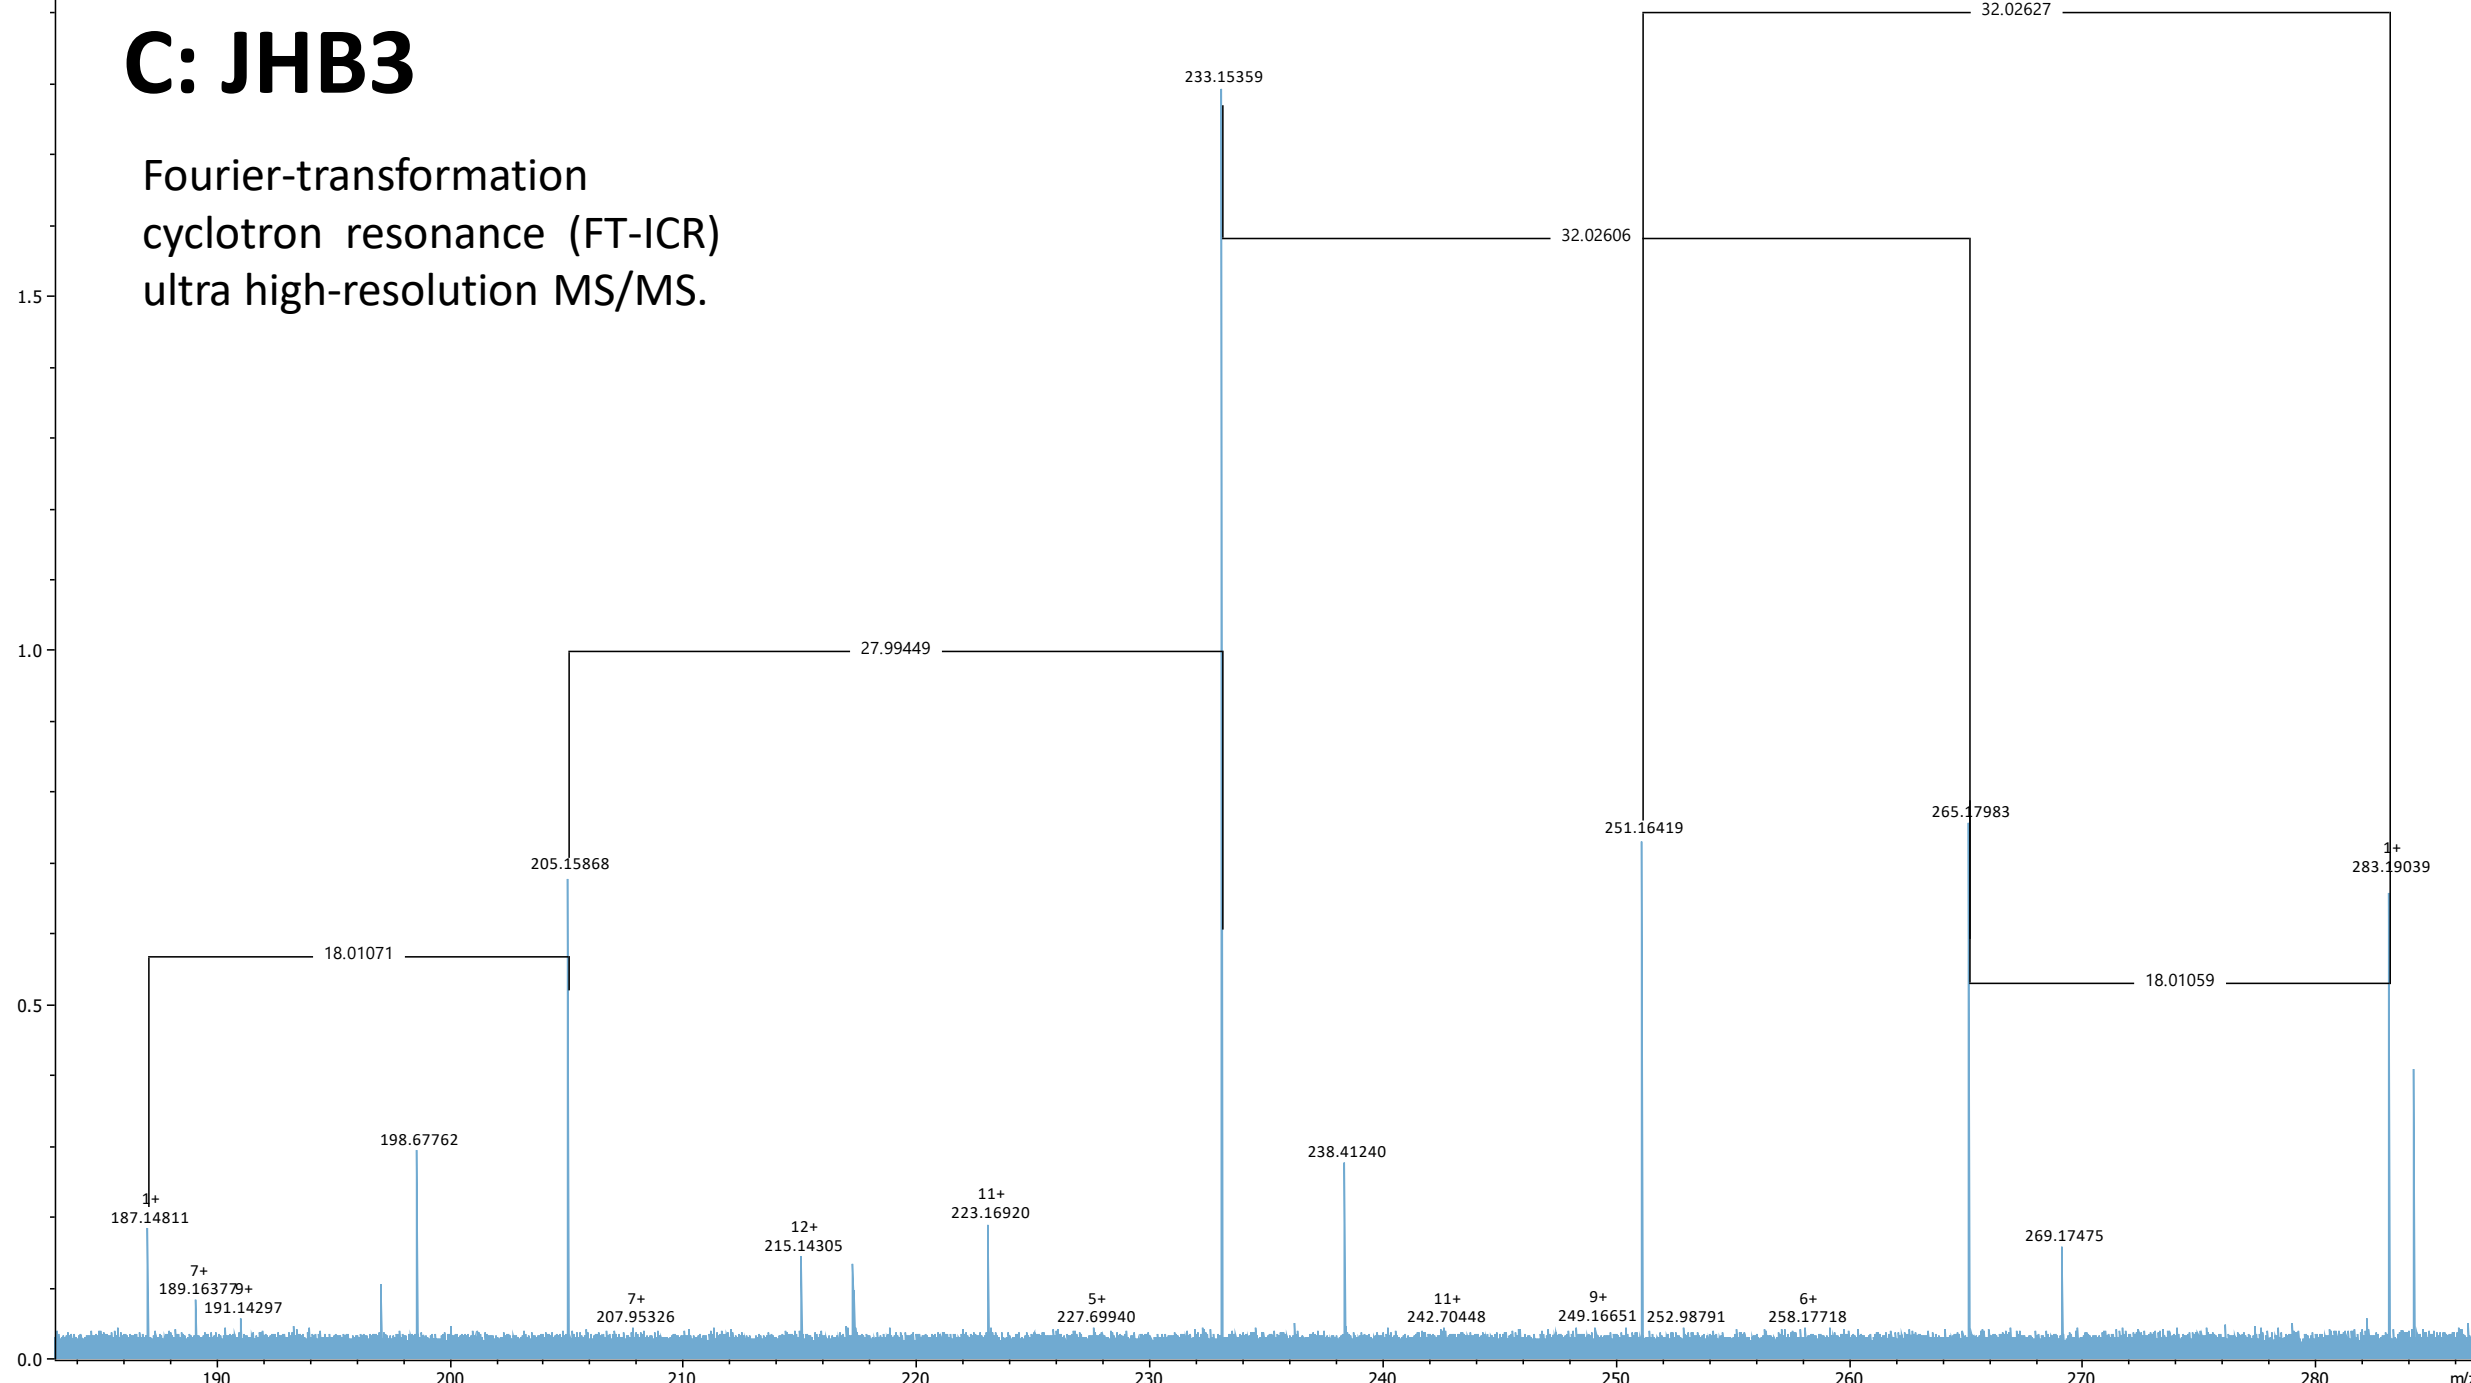

# C: JHB3

Table showing the MS/MS fragments of the hormone using the Solarix 7T FT-ICR MS.

| UHRMS data                                | m/z       | Ion                                                    | Formula                 | $\Delta m/z$ (ppm) |
|-------------------------------------------|-----------|--------------------------------------------------------|-------------------------|--------------------|
| FT-ICR MS                                 | 283.19041 | $[M+H]^+$                                              | $[C_{16}H_{26}O_4+H]^+$ | 0.085              |
| FT-ICR MS <sup>2</sup> (CID on 283.19039) | 265.17983 | $[M+H]^+ - H_2O$                                       | $[C_{16}H_{24}O_3+H]^+$ | 0.034              |
|                                           | 251.16419 | $[M+H]^+ - CH_3OH$                                     | $C_{15}H_{23}O_3^+$     | 0.076              |
|                                           | 233.15359 | $[M+H]^+ - H_2O - CH_3OH$<br>$[M+H]^+ - CH_3OH - H_2O$ | $C_{15}H_{21}O_2^+$     | -0.069             |
|                                           | 223.1692  |                                                        | $C_{14}H_{23}O_2^+$     | -0.251             |
|                                           | 215.14305 | $[M+H]^+ - H_2O - CH_3OH - CO$                         | $C_{15}H_{19}O^+$       | 0.037              |
|                                           | 205.15868 | $[M+H]^+ - H_2O - CH_3OH - CO$                         | $C_{14}H_{21}O^+$       | -0.058             |
|                                           | 187.14811 |                                                        | $C_{14}H_{19}^+$        | -0.091             |

# E: JHB3

Proposed fragmentation pathways according to the FT-ICR results.

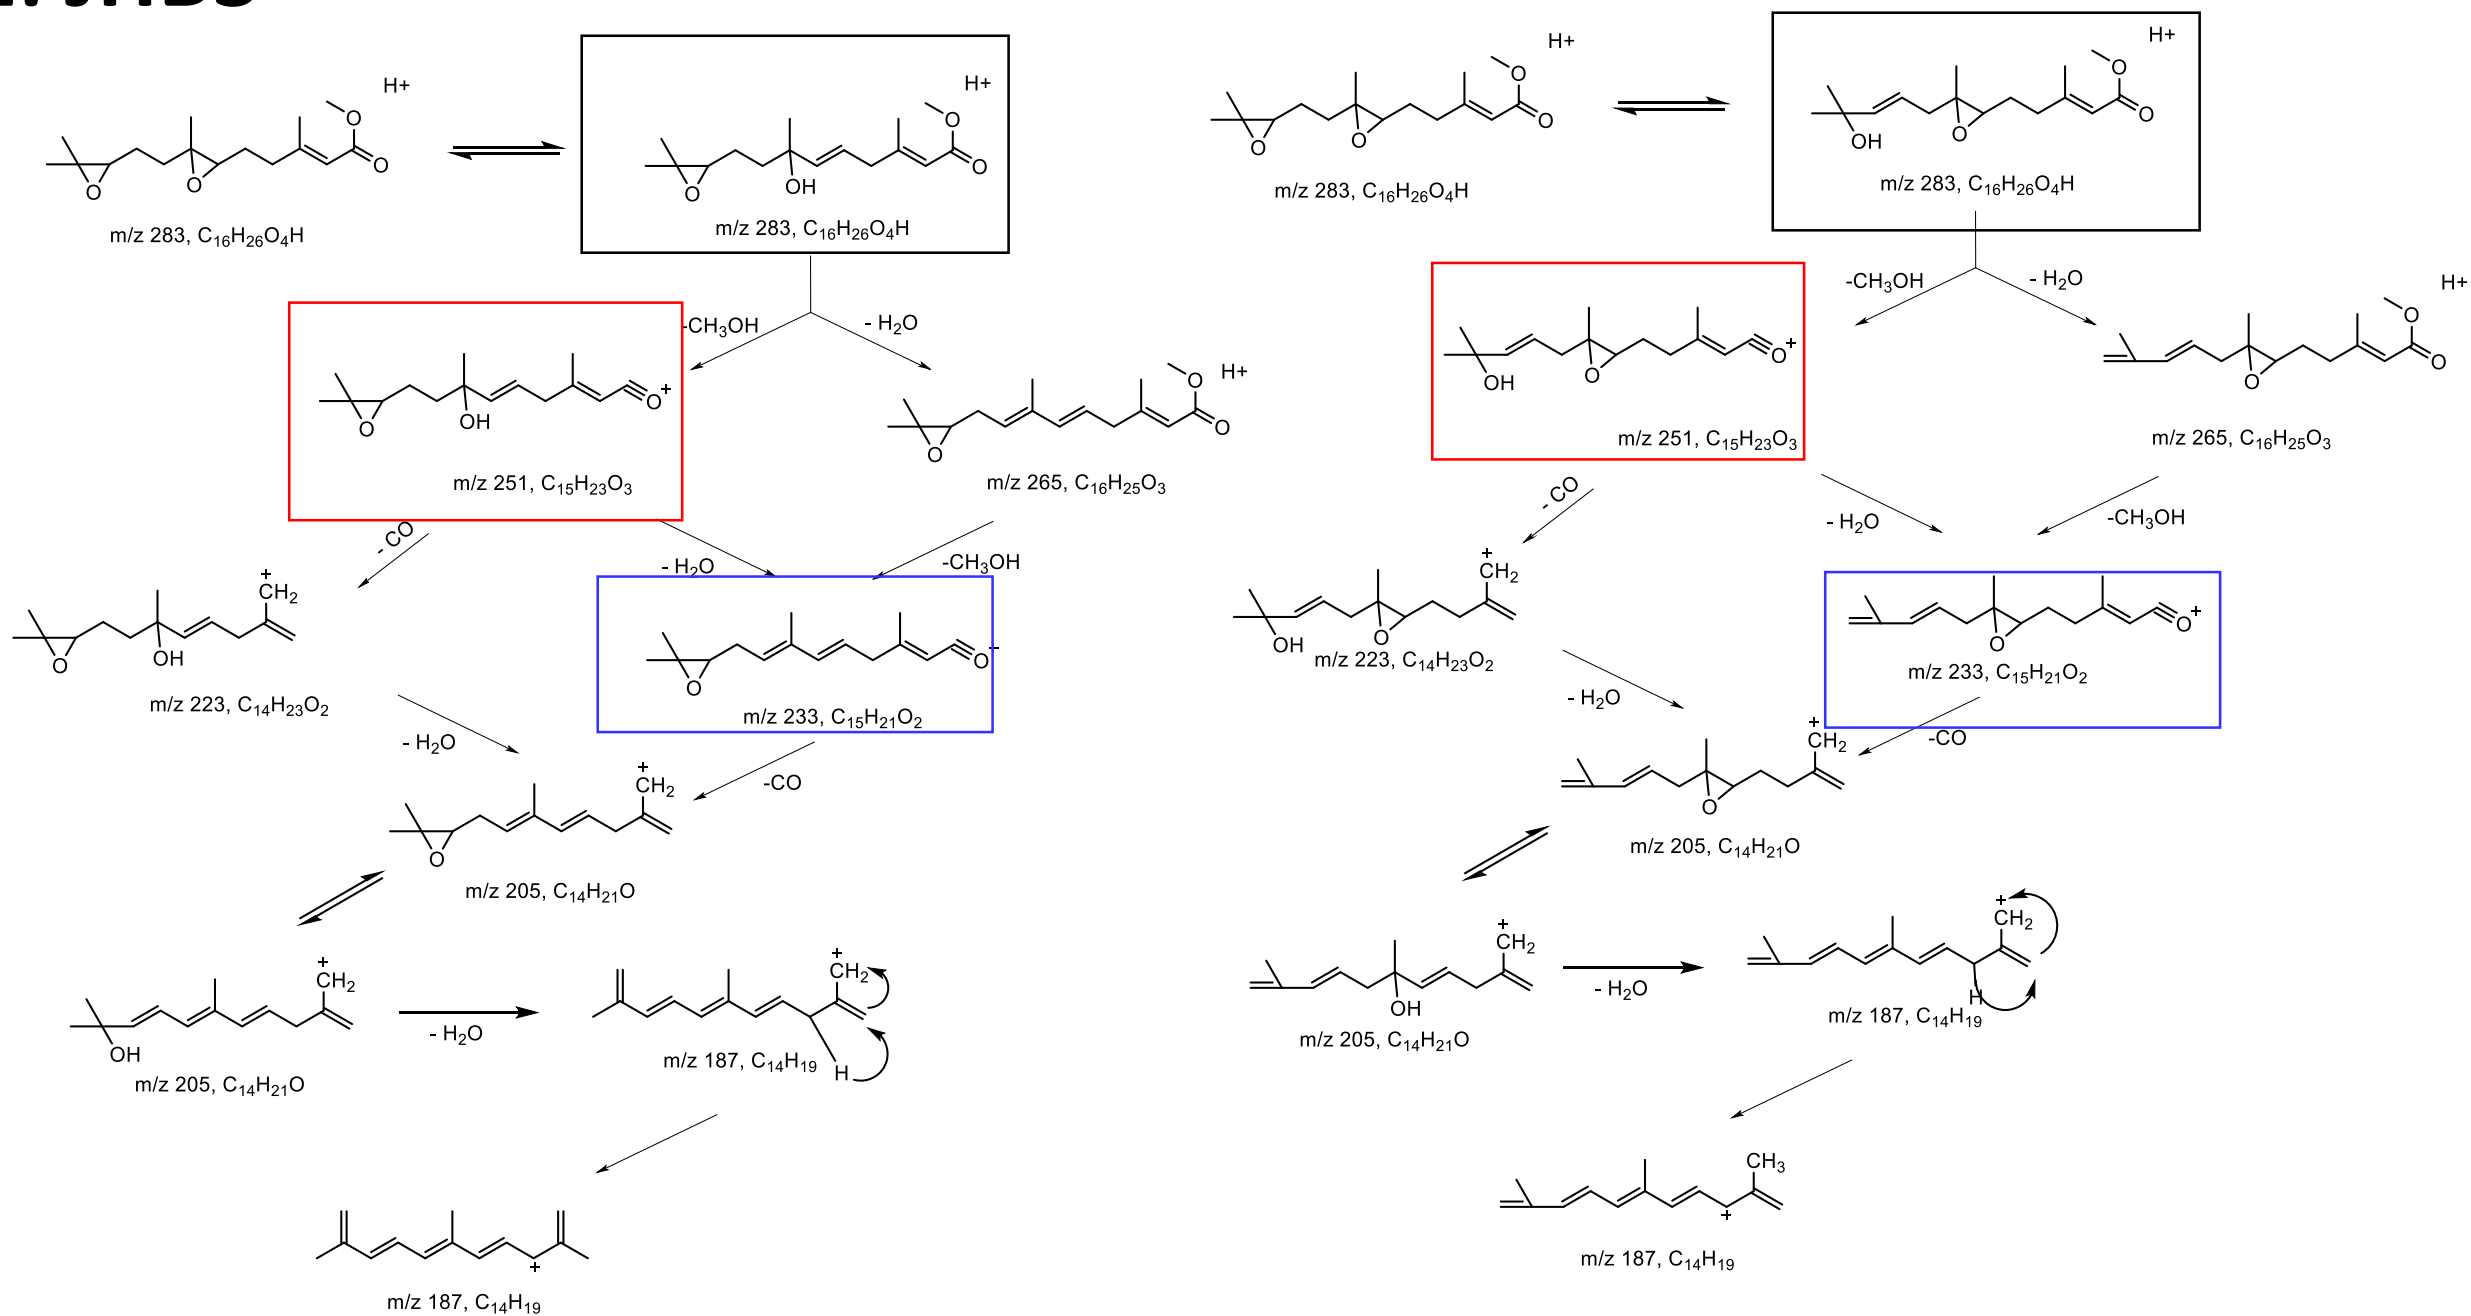

# A: MF

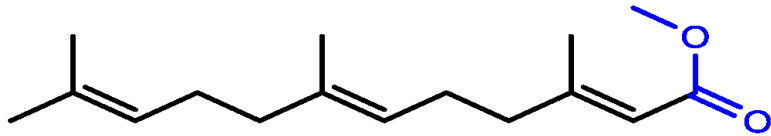

Multiple reaction monitoring (MRM) optimization output using the Bruker EvoQ LC-TQ Elite Triple Quadrupole Mass Spectrometer.

## Bruker LC-TQ MRM OPT

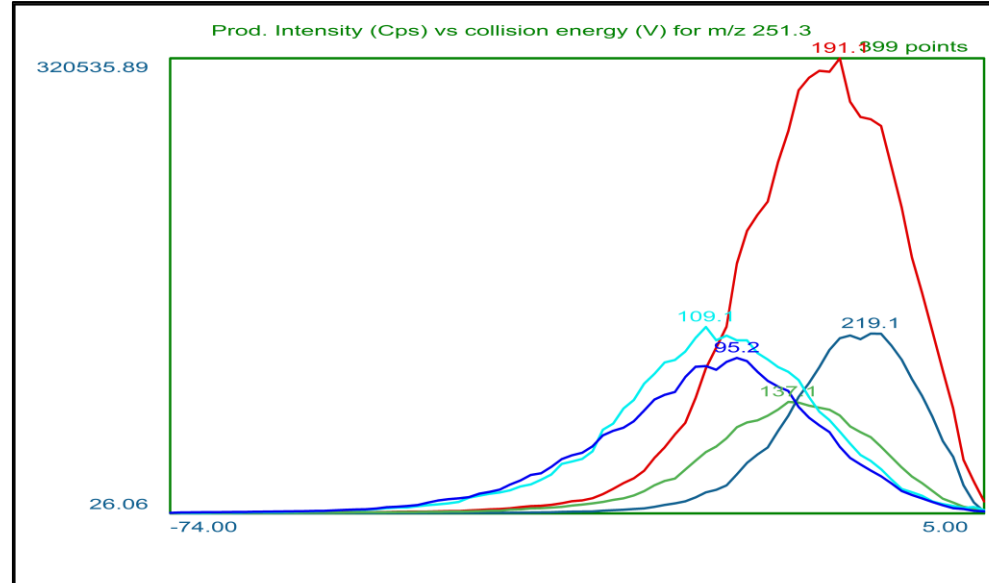

Instrument: EVOQ LC-TQ Elite  
Date: 14 Jun 2018 16:50:13  
Compound: Methyl Farnesoate  
Charge State: 1  
Precursor: 251.3 m/z  
CID pressure : 1.5 mTorr

| Prod   | CE(V) | Intens. | Ratio(%) |
|--------|-------|---------|----------|
| 191.10 | -9.0  | 3.21e5  | 100.00   |
| 109.10 | -22.0 | 1.31e5  | 40.95    |
| 219.10 | -6.0  | 1.27e5  | 39.53    |
| 95.20  | -19.0 | 1.10e5  | 34.17    |
| 137.10 | -14.0 | 7.85e4  | 24.50    |

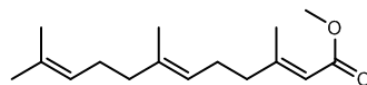

MF

251.3→191.2 ; 9.0  
295.2→219.2 ; 6.0

10.0

# B: MF

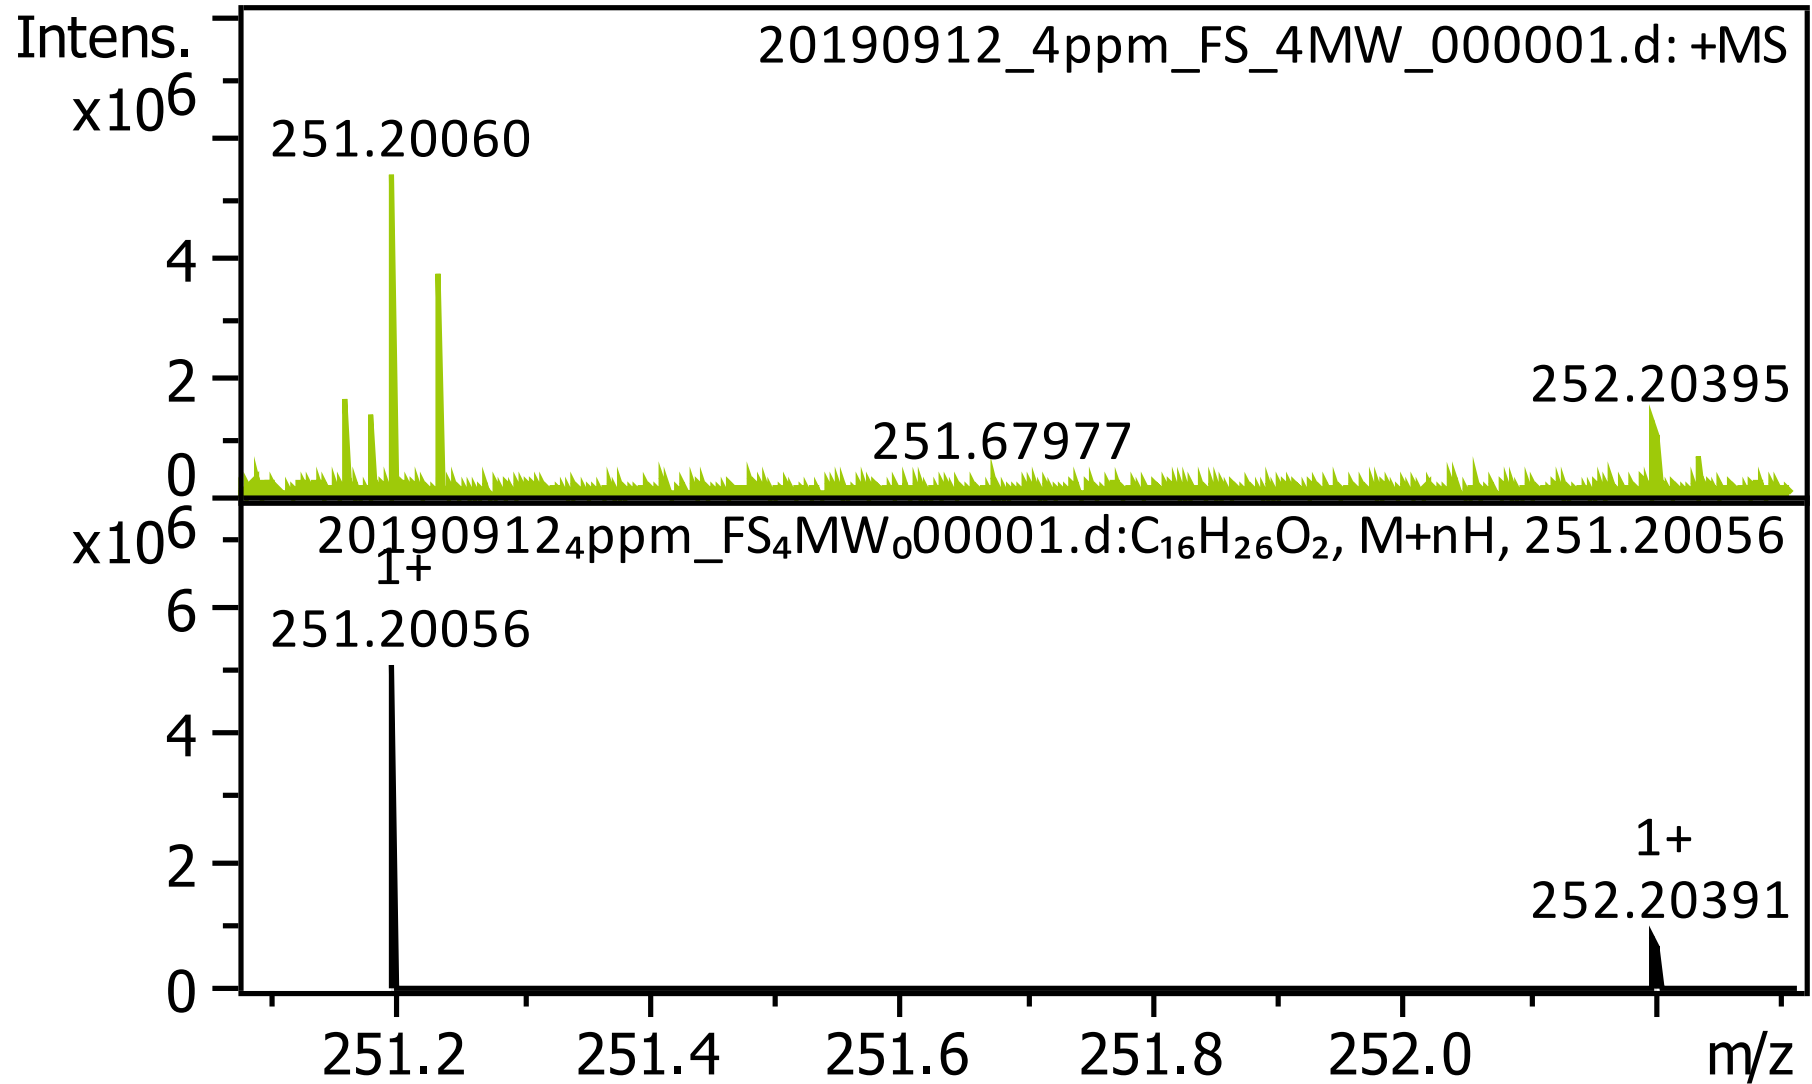

Ultra high resolution mass spectra of the standard obtained by direct infusion using the Solarix 7T FT-ICR MS .

**C: MF**Fourier-transformation  
cyclotron resonance (FT-ICR)  
ultra high-resolution MS/MS.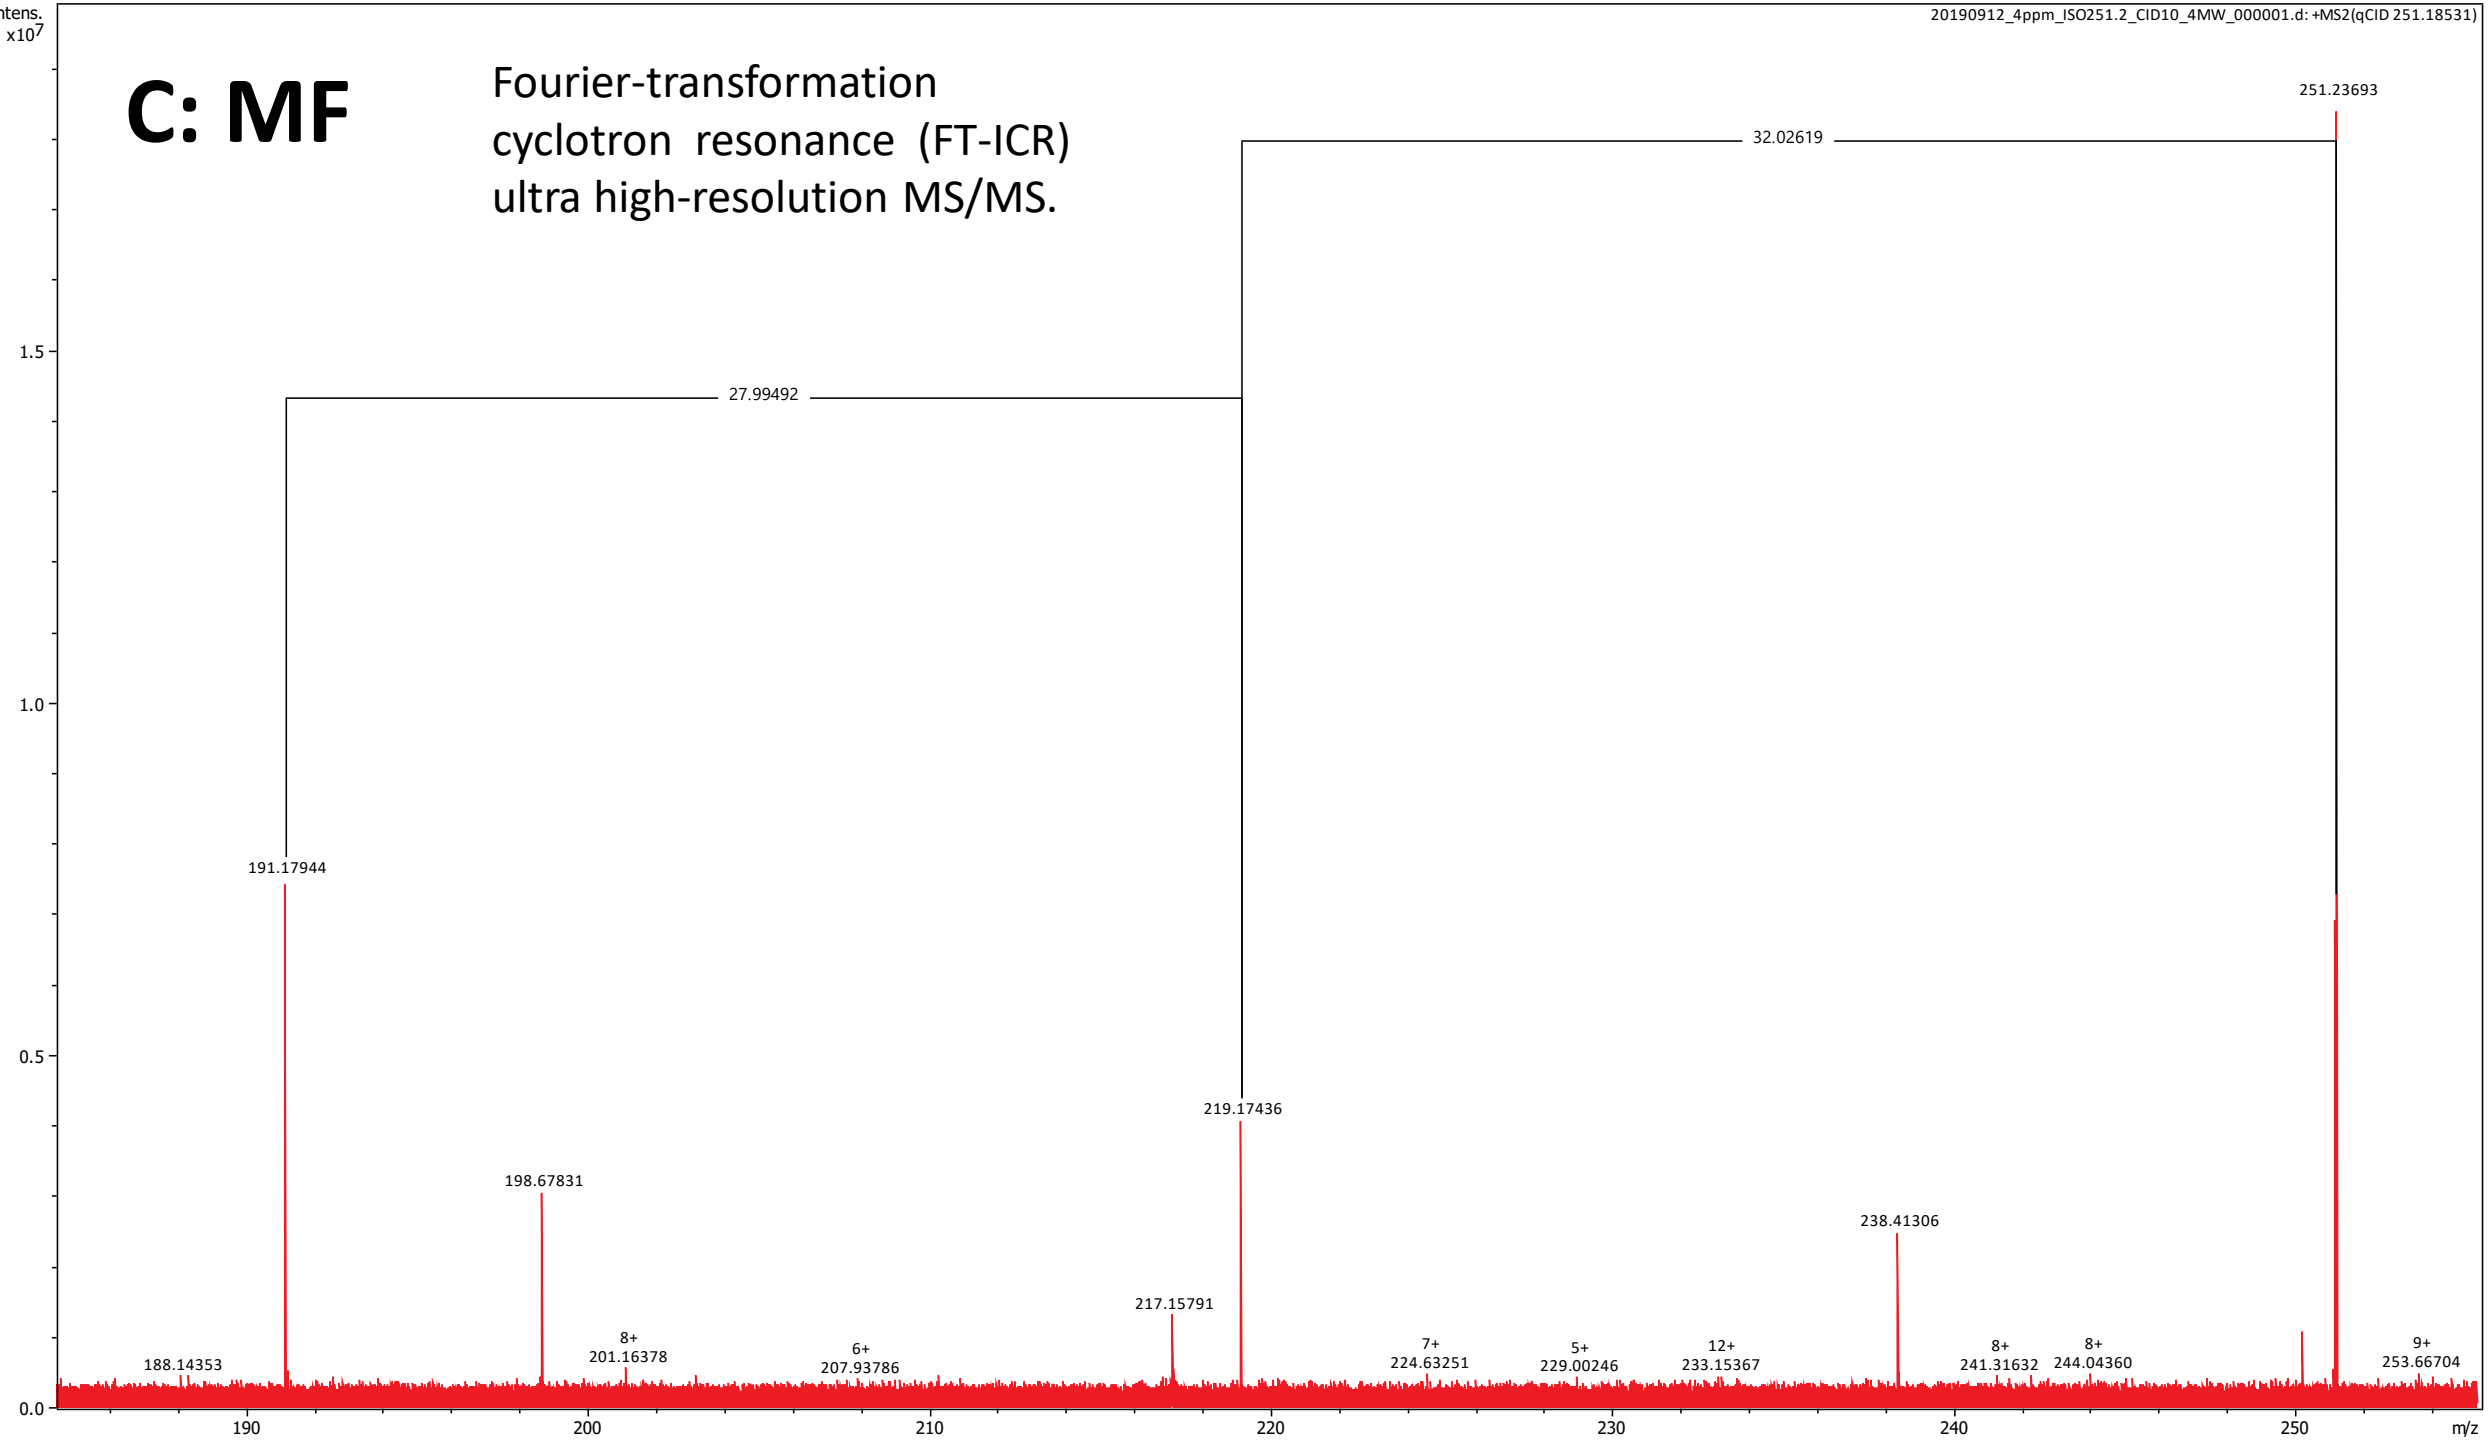



# C: MF

Table showing the MS/MS fragments of the hormone using the Solarix 7T FT-ICR MS.

| UHRMS data                               | m/z       | Ion                | Formula                 | $\Delta m/z$ (ppm) |
|------------------------------------------|-----------|--------------------|-------------------------|--------------------|
| FT-ICR MS                                | 251.2006  | $[M+H]^+$          | $[C_{16}H_{26}O_4+H]^+$ | 0.171              |
| FT-ICR MS <sup>2</sup> (CID on 251.2006) | 219.17436 | $[M+H]^+ - H_2O$   | $[C_{16}H_{22}O_2+H]^+$ | 0.082              |
|                                          | 191.17944 | $[M+H]^+ - CH_3OH$ | $C_{15}H_{23}O_3^+$     | 0.068              |

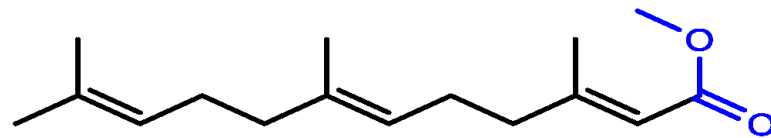

# E: MF

Proposed fragmentation pathways according to the FT-ICR results.

Black box: parent ion

Blue box: primary transition

Red box: secondary transition

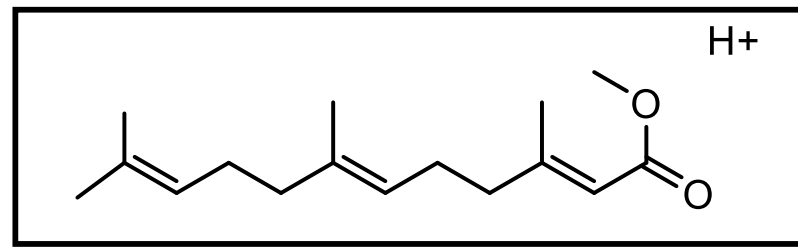

$m/z$  251,  $\text{C}_{16}\text{H}_{26}\text{O}_2\text{H}$

$-\text{CH}_3\text{OH}$

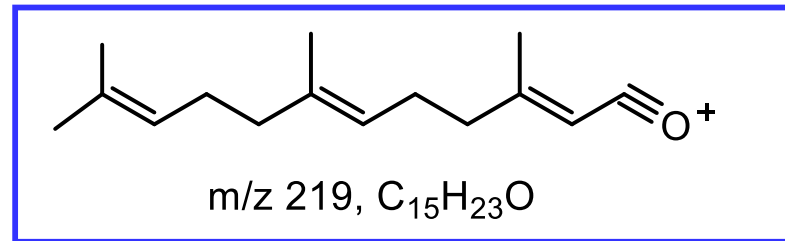

$-\text{CO}$

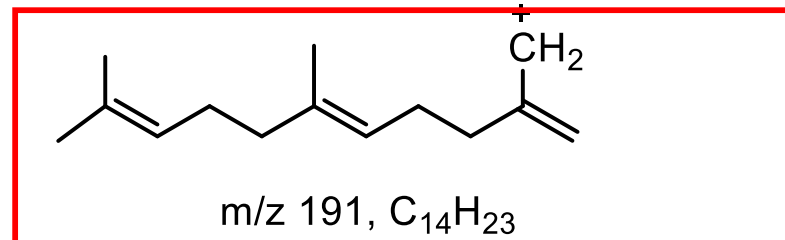

# A: JH III

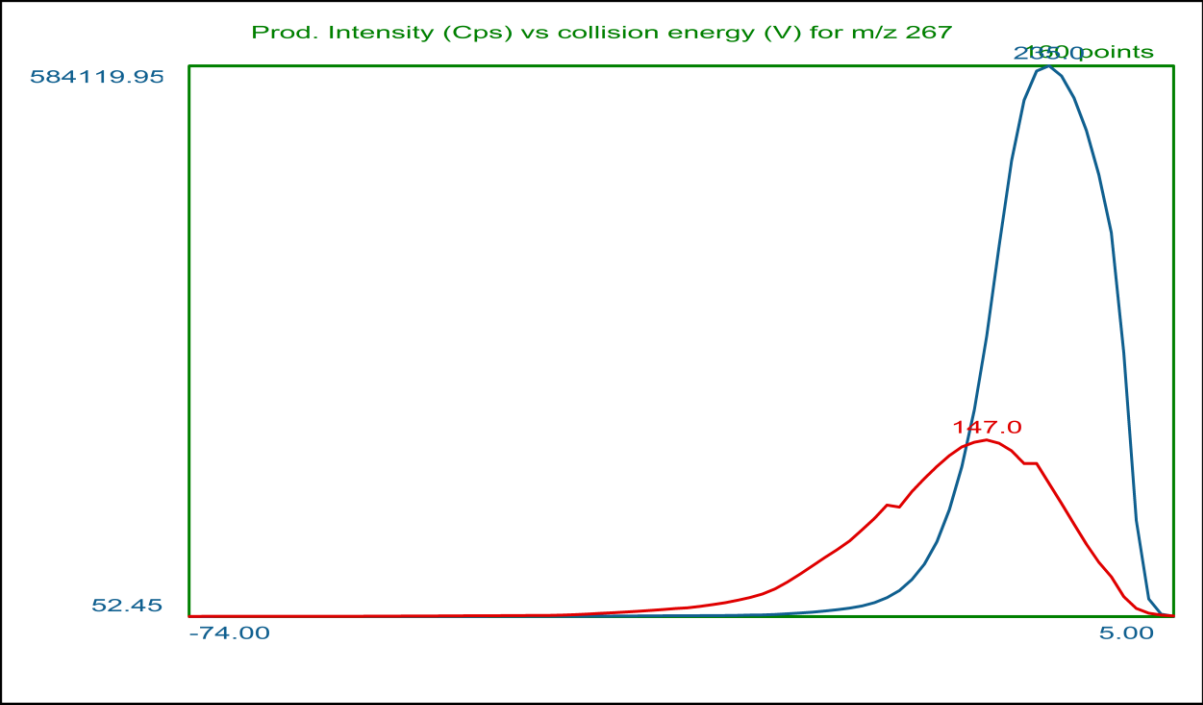

Instrument: EVOQ LC-TQ Elite  
Date: 10 Jan 2018 14:08:51  
Compound: JH III  
Charge State: 1  
Precursor: 267.0 m/z  
CID pressure : 1.6 mTorr

| Prod   | CE(V) | Intens. | Ratio(%) |
|--------|-------|---------|----------|
| 235.00 | -5.0  | 5.84e5  | 100.00   |
| 147.00 | -10.0 | 1.87e5  | 32.08    |

# A: JH III-D3

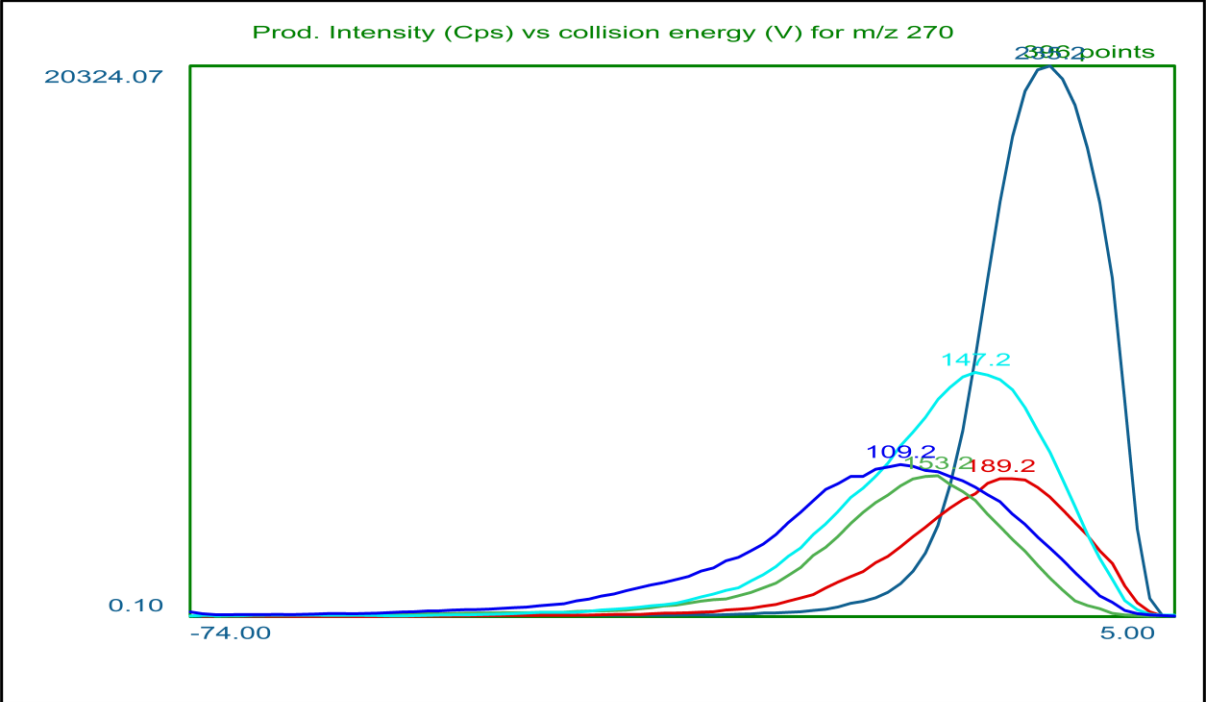

Instrument: EVOQ LC-TQ Elite  
Date: 23 Jan 2018 15:34:21  
Compound: JH III-D3  
Charge State: 1  
Precursor: 270.0 m/z  
CID pressure : 1.5 mTorr

| Prod   | CE(V) | Intens. | Ratio(%) |
|--------|-------|---------|----------|
| 235.20 | -5.0  | 2.03e4  | 100.00   |
| 147.20 | -11.0 | 9.01e3  | 44.34    |
| 109.20 | -17.0 | 5.61e3  | 27.61    |
| 153.20 | -14.0 | 5.20e3  | 25.58    |
| 189.20 | -9.0  | 5.09e3  | 25.05    |

# Fragmentation of JH III (from Ramirez et al, 2016)

|                          | Parent <i>m/z</i>                                         | Fragment <i>m/z</i>                                       |
|--------------------------|-----------------------------------------------------------|-----------------------------------------------------------|
| <b>In-source MS/MS</b>   | 267                                                       | 249, 235, 217, 189, 147                                   |
|                          | 249                                                       | 217, 189, 147                                             |
|                          | 235                                                       | 217, 189, 147                                             |
|                          | 217                                                       | 189, 147                                                  |
|                          | 189                                                       | 147                                                       |
| <b>MS/MS<sup>n</sup></b> | 267 → 235                                                 | 217, 207, 189                                             |
|                          | 267 → 249                                                 | 217, 189, 147                                             |
|                          | 267 → 217                                                 | 189, 147                                                  |
|                          | 267 → 189                                                 | 147                                                       |
| <b>FT-ICR MS/MS</b>      | 267.195461 C <sub>16</sub> H <sub>27</sub> O <sub>3</sub> | 249.18492 C <sub>16</sub> H <sub>25</sub> O <sub>2</sub>  |
|                          |                                                           | 235.169298 C <sub>15</sub> H <sub>23</sub> O <sub>2</sub> |
|                          |                                                           | 217.158786 C <sub>15</sub> H <sub>21</sub> O              |
|                          |                                                           | 207.174417 C <sub>14</sub> H <sub>23</sub> O              |
|                          |                                                           | 189.163858 C <sub>14</sub> H <sub>21</sub>                |
|                          |                                                           | 147.116827 C <sub>11</sub> H <sub>15</sub>                |

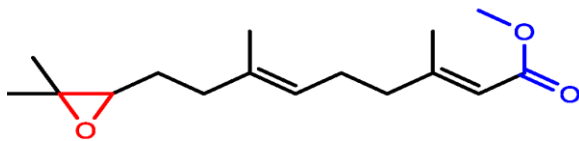

# Fragmentation of JH III (from Ramirez et al, 2016)

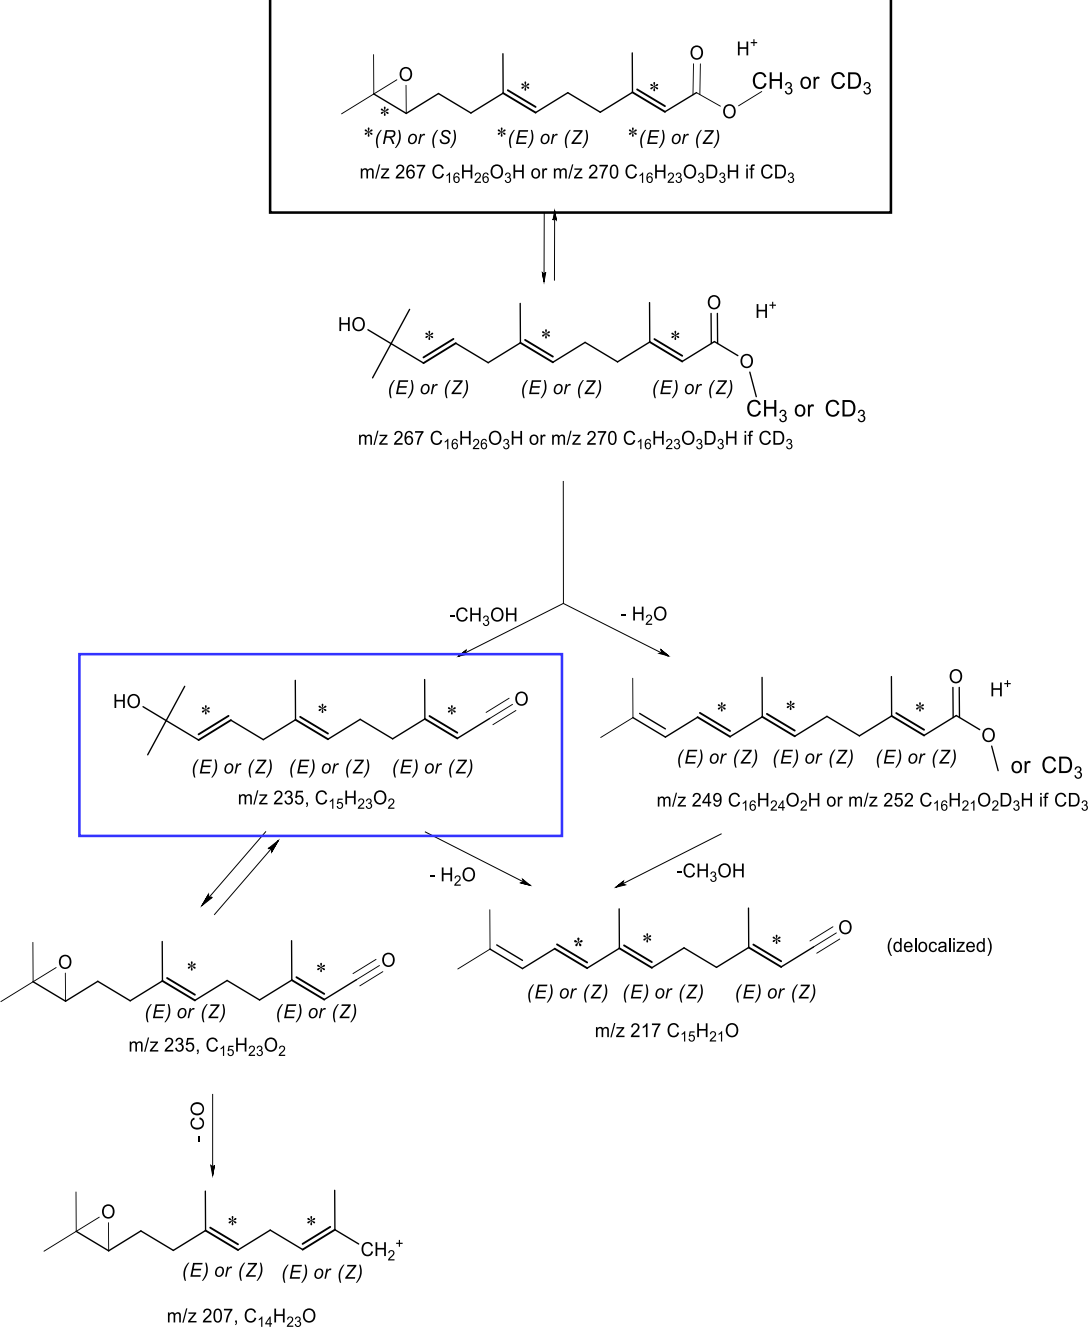

Supplement: NIHMS1545421-supplement-2.pdf [file NIHMS1545421-supplement-2.pdf]
