# Supplementary material
Source: PubMed Central journal article supplement (PMC6983331)

**Supplemental Figure 2.** MF standard curve. Relationship between the concentration of standard in ppb (X axis) and signal intensity (IS) (Y axis) for MF. The calibration curve was constructed using 46 different standard curves replicates. Linearity were observed over a 10-600 pg/mL concentration range.

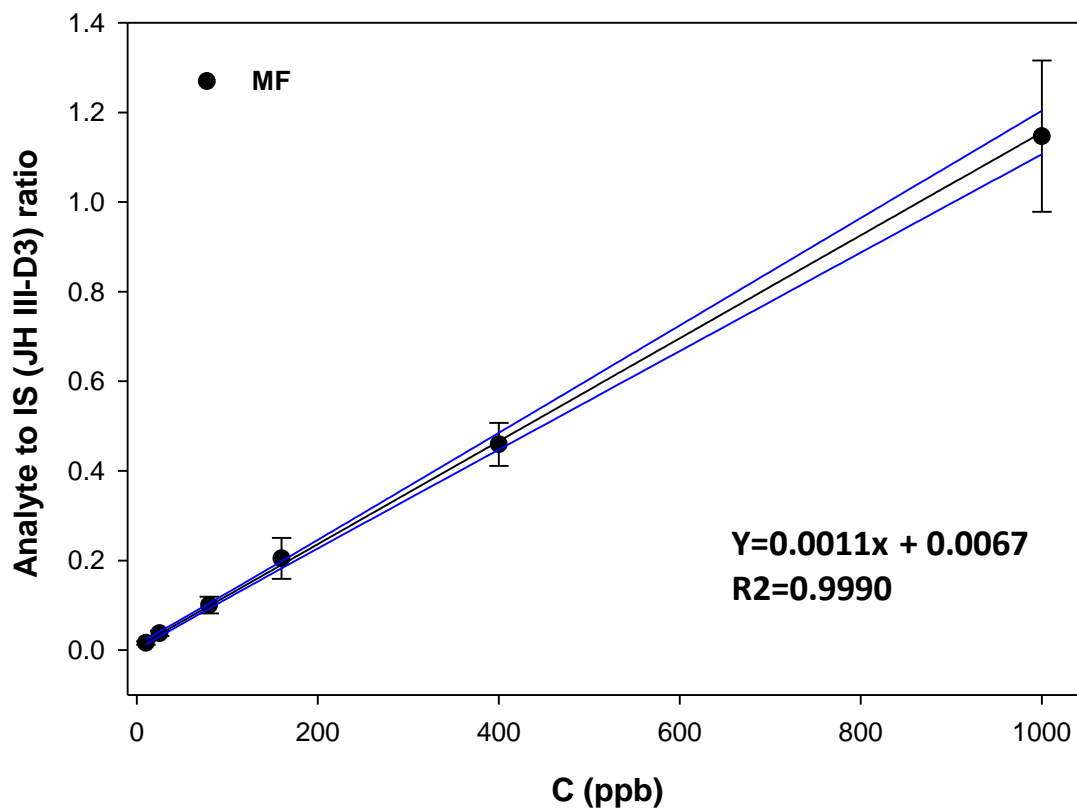

Supplement: NIHMS1545421-supplement-1.pdf [file NIHMS1545421-supplement-1.pdf]
